# Supplementary material for: Synthesis and Biological Evaluation of New Quinoline and Anthranilic Acid Derivatives as Potential Quorum Sensing Inhibitors
Source: MDPI journal article supplement (doi:10.3390/molecules28155866), 2023-08-03

## Supplementary Materials

# Synthesis and Biological Evaluation of New Quinoline and Anthranilic Acid Derivatives as Potential Quorum Sensing Inhibitors

Ivana Perković <sup>1,\*</sup>, Tanja Poljak <sup>2</sup>, Kirsi Savijoki <sup>3,\*</sup>, Pekka Varmanen <sup>3</sup>, Gordana Maravić-Vlahoviček <sup>1</sup>, Maja Beus <sup>1</sup>, Anja Kučević <sup>1</sup>, Ivan Džajić <sup>4</sup> and Zrinka Rajić <sup>1</sup>

<sup>1</sup> Faculty of Pharmacy and Biochemistry, University of Zagreb, 10000 Zagreb, Croatia; gmaravic@pharma.hr (G.M.-V.); [mbeus@pharma.hr](mailto:mbeus@pharma.hr) (M.B.); anja.kucevic@proton.me (A.K.); zrajic@pharma.hr (Z.R.)

<sup>2</sup> Selvita Ltd., 10000 Zagreb, Croatia; tanja.poljak@selvita.com

<sup>3</sup> Department of Food and Nutrition, Faculty of Agriculture and Forestry, University of Helsinki, 00014 Helsinki, Finland; pekka.varmanen@helsinki.fi

<sup>4</sup> Faculty of Pharmacy, University of Ljubljana, 1000 Ljubljana, Slovenia; ivan.dzajic@ffa.uni-lj.si

\* Correspondence: iperkovic@pharma.hr (I.P.); kirsi.savijoki@helsinki.fi (K.S.)

**Table S1.**  $^1\text{H}$  and  $^{13}\text{C}$  NMR spectroscopic data for acylsemicarbazides.

| 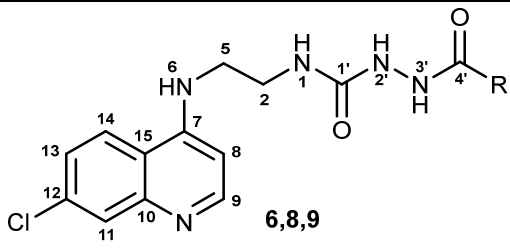 |                                                                                     |                                                                                                                                                                                                                                                                                                                                                                                                   |                                                                                                                                                                                                                                                 |
|-----------------------------------------------------------------------------------|-------------------------------------------------------------------------------------|-------------------------------------------------------------------------------------------------------------------------------------------------------------------------------------------------------------------------------------------------------------------------------------------------------------------------------------------------------------------------------------------------------------------------------------------------------------------------------------|-------------------------------------------------------------------------------------------------------------------------------------------------------------------------------------------------------------------------------------------------|
| Compd.                                                                            | R                                                                                   | $^1\text{H}$ NMR (DMSO- $d_6$ , $\delta$ ppm, $J/\text{Hz}$ )                                                                                                                                                                                                                                                                                                                                                                                                                       | $^{13}\text{C}$ NMR (DMSO- $d_6$ , $\delta$ ppm)                                                                                                                                                                                                |
| 6                                                                                 |    | 9.93–9.72 (bs, 1H, 3'), 8.40 (d, 1H, $J$ = 5.2 Hz, 9), 8.16 (d, 1H, $J$ = 8.8 Hz, 14), 8.05 – 7.92 (bs, 1H, 2'), 7.79 (d, 1H, $J$ = 2.8 Hz, 11), 7.60 (d, 1H, $J$ = 8.4 Hz, 6'), 7.43 (dd, 1H, $J$ = 10.4, 2.4 Hz, 13), 7.48–7.36 (m, 1H, 6), 7.18 (dt, 1H, $J$ = 8.4, 1.2 Hz, 8'), 6.86–6.75 (bs, 1H, 1), 6.72 (d, 1H, $J$ = 6.00 Hz, 9'), 6.57 (d, 1H, $J$ = 5.6 Hz, 8), 6.51 (t, 1H, $J$ = 7.6 Hz, 7'), 6.44–6.32 (bs, 2H, 11'), 3.40–3.25 (m, 4H, 2, 5)                         | 168.9 (4'), 159.3 (1'), 152.0 (9), 150.1 (7), 150.0 (10), 149.0 (10'), 133.4 (12), 132.2 (8'), 128.4 (11), 127.5 (6'), 124.1 (13), 123.8 (14), 117.3 (15), 116.3 (9'), 114.4 (7'), 112.4 (5'), 98.6 (8), 43.4 (2), 37.8 (5)                     |
| 8                                                                                 |   | 10.00–9.87 (bs, 1H, 3'), 8.41 (d, 1H, $J$ = 5.4 Hz, 9), 8.16 (d, 1H, $J$ = 8.4 Hz, 14), 8.02 (s, 1H, 2'), 7.79 (d, 1H, $J$ = 2.4 Hz, 11), 7.61 (d, 1H, $J$ = 9.0 Hz, 6'), 7.44 (dd, 1H, $J$ = 9.6, 2.4 Hz, 13), 7.41 (t, 1H, $J$ = 4.8 Hz, 6), 6.88–6.80 (bs, 1H, 1), 6.79 (d, 1H, $J$ = 2.4 Hz, 9'), 6.73–6.65 (bs, 2H, 1'), 6.56 (d, 1H, $J$ = 5.4 Hz, 8), 6.54 (dd, 1H, $J$ = 9.0, 1.8 Hz, 7'), 3.38–3.27 (m, 4H, 2, 5)                                                          | 168.2 (4'), 159.2 (1'), 152.0 (9), 151.2 (10), 150.1 (7), 149.0 (10'), 136.7 (8'), 133.4 (12), 130.3 (6'), 127.5 (11), 124.1 (13), 123.8 (14), 117.3 (15), 115.0 (9'), 114.1 (7'), 111.2 (5'), 98.6 (8), 43.3 (2), 37.8 (5)                     |
| 9                                                                                 |  | 10.08–9.85 (bs, 1H, 3'), 8.56 (s, 1H, 2'), 8.41 (d, 1H, $J$ = 6.0 Hz, 9), 8.18 (d, 1H, $J$ = 9.0 Hz, 14), 7.79 (d, 1H, $J$ = 2.0 Hz, 11), 7.46 (dd, 1H, $J$ = 4.5, 2.0 Hz, 13), 7.40 (t, 1H, $J$ = 5.0 Hz, 6), 7.05 (t, 1H, $J$ = 7.5 Hz, 1), 6.63 (d, 1H, $J$ = 9.0 Hz, 9'), 6.63 (s, 1H, 8'), 6.56 (d, 1H, $J$ = 5.0 Hz, 8), 6.54 (d, 1H, $J$ = 6.5 Hz, 7'), 5.99 (s, 2H, 11'), 3.46–3.41 (m, 4H, 2, 5)                                                                           | 165.9 (4'), 159.2 (1'), 152.0 (9), 150.0 (10), 149.0 (10'), 147.9 (7), 133.4 (12), 130.6 (8'), 130.5 (6'), 127.5 (11), 124.2 (13), 123.9 (14), 119.1 (5'), 117.3 (15), 115.1 (7'), 113.2 (9'), 98.7 (8), 43.3 (2), 38.1 (5)                     |
| 11                                                                                |  | 9.78 (s, 1H, 2'), 8.38 (d, 1H, $J$ = 5.4 Hz, 3'), 8.28 (d, 1H, $J$ = 9.0 Hz, 9), 7.77 (d, 1H, $J$ = 2.2 Hz, 14), 7.69 (s, 1H, 11), 7.58 (d, 1H, $J$ = 7.9 Hz, 6'), 7.43 (dd, 1H, $J$ = 9.0, 2.3 Hz, 13), 7.34 (t, 1H, $J$ = 5.4 Hz, 6), 7.20 – 7.13 (m, 1H, 8'), 6.70 (dd, 1H, $J$ = 8.4, 1.2 Hz, 8), 6.52 – 6.46 (m, 3H, 1, 7', 9'), 6.41 (s, 2H, 11'), 3.28 (q, 2H, $J$ = 7.1 Hz, 5), 3.10 (q, 2H, $J$ = 6.6 Hz, 2), 1.66 (q, 2H, $J$ = 7.3 Hz, 4), 1.53 (q, 2H, $J$ = 7.1 Hz, 3) | 168.9 (4'), 158.7 (1'), 151.9 (9), 150.1 (7), 149.8 (10), 149.0 (10'), 133.3 (12), 132.1 (8'), 128.4 (11), 127.4 (6'), 124.1 (13), 124.0 (14), 117.4 (15), 116.2 (9'), 114.4 (7'), 112.7 (5'), 98.7 (8), 42.2 (2), 38.9 (5), 27.5 (4), 25.1 (3) |

|    |                                                                                   |                                                                                                                                                                                                                                                                                                                                                                                                                                                                                                                                                                                                                                                              |                                                                                                                                                                                                                                                        |
|----|-----------------------------------------------------------------------------------|--------------------------------------------------------------------------------------------------------------------------------------------------------------------------------------------------------------------------------------------------------------------------------------------------------------------------------------------------------------------------------------------------------------------------------------------------------------------------------------------------------------------------------------------------------------------------------------------------------------------------------------------------------------|--------------------------------------------------------------------------------------------------------------------------------------------------------------------------------------------------------------------------------------------------------|
| 12 | 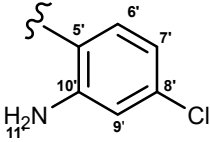 | <p>9.86 (s, 1H, 3'), 8.39 (d, 1H, <math>J = 5.4</math> Hz, 9), 8.29 (d, 1H, <math>J = 9.1</math> Hz, 14), 7.78 (d, 1H, <math>J = 2.2</math> Hz, 11), 7.72 (s, 1H, 2'), 7.58 (d, 1H, <math>J = 8.5</math> Hz, 6'), 7.44 (dd, 1H, <math>J = 9.0, 2.3</math> Hz, 13), 7.42 (t, 1H, <math>J = 5.3</math> Hz, 6), 6.77 (d, 1H, <math>J = 2.2</math> Hz), 6.66 (s, 2H, 11'), 6.52 (dd, 2H, <math>J = 8.5, 2.2</math> Hz, 9'), 6.49 (d, 1H, <math>J = 5.5</math> Hz, 8), 3.29 (q, 2H, <math>J = 7.1</math> Hz, 5), 3.09 (q, 2H, <math>J = 6.6</math> Hz, 2), 1.69 – 1.62 (m, 2H, 4), 1.56 – 1.49 (m, 2H, 3)</p>                                                     | <p>168.1 (4'), 158.6 (1'), 151.5 (9), 151.1 (10), 150.3 (7), 148.6 (10'), 136.6 (8'), 133.5 (12), 130.3 (6'), 127.1 (11), 124.2 (13), 124.1 (14), 117.4 (15), 115.0 (9'), 114.1 (7'), 111.5 (5'), 98.7 (8), 42.2 (2), 38.9 (5), 27.6 (4), 25.1 (3)</p> |
| 14 |  | <p>9.92 (s, 1H, 3'), 8.39 (d, 1H, <math>J = 5.4</math> Hz, 9), 8.28 (d, 1H, <math>J = 9.1</math> Hz, 14), 8.17 (s, 1H, 2'), 7.77 (d, 1H, <math>J = 2.2</math> Hz, 11), 7.42 (dd, 1H, <math>J = 9.0, 2.3</math> Hz, 13), 7.32 (t, 1H, <math>J = 5.4</math> Hz, 6), 7.04 (t, 1H, <math>J = 8.1</math> Hz, 8'), 6.60 (dd, 1H, <math>J = 8.3, 1.0</math> Hz, 7'), 6.54 (dd, 2H, <math>J = 7.8, 0.9</math> Hz, 9'), 6.49 (d, 1H, <math>J = 5.5</math> Hz, 8), 6.35 (t, 1H, <math>J = 5.8</math> Hz, 1), 5.93 (s, 2H, 11'), 3.29 (q, 2H, <math>J = 7.1</math> Hz, 5), 3.13 (q, 2H, <math>J = 6.6</math> Hz, 2), 1.72 – 1.64 (m, 2H, 4), 1.59 – 1.51 (m, 2H, 3)</p> | <p>166.0 (4'), 158.6 (1'), 152.0 (9), 150.1 (7), 149.1 (10'), 147.9 (10), 133.3 (12), 130.6 (8'), 130.6 (6'), 127.5 (11), 124.1 (13), 124.0 (14), 119.1 (5'), 117.5 (15), 115.1 (7'), 113.2 (9'), 98.7 (8), 42.1 (2), 39.1 (5), 27.5 (4), 25.1 (3)</p> |

**Table S2.**  $^1\text{H}$  and  $^{13}\text{C}$  NMR spectroscopic data for 1,3,4-oxadiazoles.

| <div style="display: flex; justify-content: space-around; align-items: center;"> <div style="text-align: center;"> 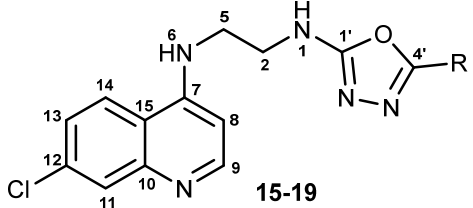 <p><b>15-19</b></p> </div> <div style="text-align: center;">  <p><b>20-23</b></p> </div> </div> |                                                                                     |                                                                                                                                                                                                                                                                                                                                                                                                                                 |                                                                                                                                                                                                                                                                                  |
|----------------------------------------------------------------------------------------------------------------------------------------------------------------------------------------------------------------------------------------------------------------------------------------------------------------------------------------------------------------------------------------|-------------------------------------------------------------------------------------|---------------------------------------------------------------------------------------------------------------------------------------------------------------------------------------------------------------------------------------------------------------------------------------------------------------------------------------------------------------------------------------------------------------------------------|----------------------------------------------------------------------------------------------------------------------------------------------------------------------------------------------------------------------------------------------------------------------------------|
| Compd.                                                                                                                                                                                                                                                                                                                                                                                 | R                                                                                   | $^1\text{H}$ NMR (DMSO- $d_6$ , $\delta$ ppm, J/Hz)                                                                                                                                                                                                                                                                                                                                                                             | $^{13}\text{C}$ NMR (DMSO- $d_6$ , $\delta$ ppm)                                                                                                                                                                                                                                 |
| 15                                                                                                                                                                                                                                                                                                                                                                                     |    | 8.43 (d, 1H, $J$ = 6.0 Hz, 9), 8.22 (d, 1H, $J$ = 9.6 Hz, 14), 7.92 (t, 1H, $J$ = 5.4 Hz, 1), 7.79 (d, 1H, $J$ = 4.2 Hz, 11), 7.52 (t, 1H, $J$ = 5.4 Hz, 6), 7.45 (dd, 1H, $J$ = 4.2 Hz, 2.4 Hz, 13), 7.38 (dd, 1H, $J$ = 7.5, 1.2 Hz, 6'), 7.16 (dt, 1H, $J$ = 7.8, 1.8 Hz, 8'), 6.83 (d, 1H, $J$ = 4.2 Hz, 9'), 6.64 (d, 1H, $J$ = 3.0 Hz, 7'), 6.60 (t, 1H, $J$ = 7.2 Hz, 7'), 6.58 – 6.52 (bs, 2H, 11'), 3.55 (m, 4H, 2, 5) | 162.5 (1'), 158.7 (4'), 152.3 (9), 150.6 (10'), 149.5 (10), 147.2 (7), 134.0 (12), 131.4 (8'), 127.9 (11), 126.6 (6'), 124.6 (13), 124.5 (14), 117.9 (15), 115.9 (9'), 115.8 (7'), 105.6 (5'), 99.1 (8), 41.9 (2), 41.3 (5)                                                      |
| 16                                                                                                                                                                                                                                                                                                                                                                                     |   | 8.46 (d, 1H, $J$ = 10.8 Hz, 9), 8.30 (d, 1H, $J$ = 9.6 Hz, 14), 8.04 (t, 1H, $J$ = 7.2 Hz, 1), 8.03 – 7.93 (bs, 1H, 8'), 7.83 (d, 1H, $J$ = 2.4 Hz, 11), 7.53 (dd, 1H, $J$ = 8.4, 1.8 Hz, 13), 7.15 (q, 1H, $J$ = 7.2 Hz, 6), 6.85 (s, 2H, 11'), 6.71 (d, 1H, $J$ = 5.4 Hz, 7'), 6.60 (d, 1H, $J$ = 8.4 Hz, 8), 6.44 – 6.40 (m, 1H, 9'), 3.63 (q, 2H, 2), 3.53 (q, 2H, 5)                                                       | 163.1 (1'), 161.2 (6'), 159.5 (4'), 155.4 (7), 151.9 (10), 150.2 (9), 149.4 (10'), 135.0 (12), 132.0 (d, $J$ = 46.2 Hz, 8'), 125.9 (11), 125.3 (13), 124.9 (14), 117.5 (15), 111.7 (9'), 101.9 (d, $J$ = 87.6 Hz, 7'), 99.1 (8), 95.1 (d, $J$ = 60.0 Hz, 5'), 42.0 (2), 41.3 (5) |
| 17                                                                                                                                                                                                                                                                                                                                                                                     |  | 8.42 (d, 1H, $J$ = 5.4 Hz, 9), 8.20 (d, 1H, $J$ = 9.6 Hz, 14), 7.97 (t, 1H, $J$ = 5.4 Hz, 1), 7.78 (d, 1H, $J$ = 1.8 Hz, 11), 7.46 (m, 1H, 6), 7.45 (dd, 1H, $J$ = 9.6, 2.4 Hz, 13), 7.34 (d, 1H, $J$ = 9.0 Hz, 6'), 6.89 (d, 1H, $J$ = 2.4 Hz, 7'), 6.83–6.78 (bs, 2H, 11'), 6.62 (m, 2H, 8, 9'), 3.54 (m, 4H, 2, 5)                                                                                                           | 162.6 (1'), 157.9 (4'), 152.4 (9), 150.5 (10'), 148.6 (10), 148.2 (7), 135.7 (8'), 133.9 (12), 128.2 (6'), 128.0 (11), 124.6 (13), 124.5 (14), 118.0 (15), 115.6 (9'), 114.8 (7'), 104.6 (5'), 99.1 (8), 41.8 (2), 41.2 (5)                                                      |
| 18                                                                                                                                                                                                                                                                                                                                                                                     |  | 8.68–8.58 (bs, 1H, 13), 8.50 (d, 1H, $J$ = 6.6 Hz, 9), 8.41 (d, 1H, $J$ = 8.4 Hz, 14), 8.01 (t, 1H, $J$ = 5.4 Hz, 1), 7.89 (s, 1H, 11), 7.62 (d, 1H, $J$ = 9.0 Hz, 7'), 7.14 (t, 1H, $J$ = 7.8 Hz, 6), 6.82 (d, 1H, $J$ = 7.2 Hz, 8'), 6.75 (d, 1H, $J$ = 9.0 Hz, 9'), 6.66 (d, 1H, $J$ = 8.4 Hz, 8), 6.22–6.12 (bs, 2H, 11'), 3.70 (q, 2H, $J$ = 3.6 Hz, 2), 3.55 (q, 2H, $J$ = 3.5 Hz, 5)                                     | 163.4 (1'), 154.4 (4'), 151.7 (9), 150.7 (7), 149.8 (10'), 148.8 (10), 136.5 (8'), 133.5 (12), 132.7 (6'), 131.8 (9'), 127.1 (11), 124.2 (13), 124.1 (14), 117.4 (5'), 116.5 (15), 114.1 (7'), 105.7 (5'), 98.6 (8), 41.4 (2), 40.9 (5)                                          |

|    |                                                                                     |                                                                                                                                                                                                                                                                                                                                                                                                                 |                                                                                                                                                                                                                                                     |
|----|-------------------------------------------------------------------------------------|-----------------------------------------------------------------------------------------------------------------------------------------------------------------------------------------------------------------------------------------------------------------------------------------------------------------------------------------------------------------------------------------------------------------|-----------------------------------------------------------------------------------------------------------------------------------------------------------------------------------------------------------------------------------------------------|
| 19 | 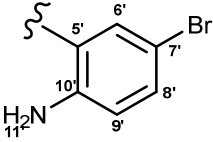   | 8.46 (d, 1H, $J$ = 6.6 Hz, 9), 8.26 (d, 1H, $J$ = 9.6 Hz, 14), 8.00 (t, 1H, $J$ = 6.0 Hz, 1), 7.82 (d, 1H, $J$ = 2.4 Hz, 11), 7.86–7.73 (m, 1H, 6), 7.49 (dd, 1H, $J$ = 8.4, 2.4 Hz, 13), 7.47 (d, 1H, $J$ = 3.6 Hz, 6'), 7.29 (dd, 1H, $J$ = 9.0, 2.4 Hz, 8'), 6.82 (d, 1H, $J$ = 9.6 Hz, 8), 6.75–6.70 (bs, 2H, 11'), 6.69 (d, 1H, $J$ = 5.4 Hz, 9'), 3.60–3.55 (m, 4H, 2, 5)                                 | na                                                                                                                                                                                                                                                  |
| 20 |    | 8.40 (d, 1H, $J$ = 5.5 Hz, 9), 8.30 (d, 1H, $J$ = 9.1 Hz, 14), 7.81 – 7.75 (m, 2H, 1, 11), 7.51 – 7.42 (m, 3H, 6, 13, 6'), 7.19 – 7.14 (m, 1H, 9'), 6.84 (dd, 1H, $J$ = 8.3, 1.1 Hz, 7'), 6.62 (t, 1H, $J$ = 8.1 Hz, 8'), 6.57 (s, 2H, 11'), 6.52 (d, 1H, $J$ = 5.6 Hz, 8), 3.36 – 3.28 (m, 4H, 2, 5), 1.78 – 1.69 (m, 4H, 3, 4)                                                                                | 162.1 (1'), 158.0 (4'), 151.2 (9), 150.5 (7), 148.3 (10), 146.7 (10'), 133.7 (12), 130.8 (8'), 126.8 (11), 126.1 (6'), 124.2 (13, 14), 117.3 (15), 115.4 (9'), 115.3 (7'), 105.2 (5'), 98.7 (8), 42.3 (2), 42.1 (5), 26.5 (4), 25.1 (3)             |
| 21 |   | 8.40 (d, 1H, $J$ = 5.5 Hz, 9), 8.30 (d, 1H, $J$ = 9.1 Hz, 14), 7.83 (t, 1H, $J$ = 5.6 Hz, 1), 7.79 (d, 1H, $J$ = 2.1 Hz, 11), 7.50 (t, 1H, $J$ = 4.9 Hz, 6), 7.46 (dd, 1H, $J$ = 9.0, 2.1 Hz, 13), 7.41 (d, 1H, $J$ = 8.5 Hz, 6'), 6.90 (d, 1H, $J$ = 2.0 Hz, 7'), 6.81 (s, 2H, 11'), 6.64 (dd, 1H, $J$ = 8.5, 2.0 Hz, 9'), 6.53 (d, 1H, $J$ = 5.6 Hz, 8), 3.80 – 3.08 (m, 4H, 2, 5), 1.94 – 1.51 (m, 4H, 3, 4) | 162.6 (1'), 157.7 (4'), 151.6 (9), 151.0 (10'), 148.6 (10), 148.2 (7), 135.6 (8'), 134.2 (12), 128.2 (6'), 127.1 (11), 124.7 (13, 14), 117.7 (15), 115.6 (9'), 114.8 (7'), 104.7 (5'), 99.1 (8), 42.8 (2), 42.6 (5), 26.9 (4), 25.5 (3)             |
| 22 |  | 8.39 (d, 1H, $J$ = 5.5 Hz, 9), 8.29 (d, 1H, $J$ = 9.0 Hz, 14), 7.84 (t, 1H, $J$ = 5.7 Hz, 1), 7.78 (d, 1H, $J$ = 2.3 Hz, 11), 7.48 – 7.44 (m, 2H, 6, 13), 7.39 (d, 1H, $J$ = 2.5 Hz, 6'), 7.20 (dd, 1H, $J$ = 8.8, 2.5 Hz, 8'), 6.87 (d, 1H, $J$ = 8.8 Hz, 9'), 6.71 (s, 2H, 11'), 6.52 (d, 1H, $J$ = 5.5 Hz, 8), 3.40 – 3.31 (m, 4H, 2, 5), 1.77 – 1.70 (m, 4H, 3, 4)                                          | 162.3 (1'), 156.9 (4'), 151.3 (9), 150.4 (10'), 148.4 (10), 145.5 (7), 133.7 (12), 130.5 (8'), 126.9 (11), 124.9 (6'), 124.2 (8'), 124.2 (13, 14), 118.4 (7'), 117.3 (9'), 117.2 (15), 106.3 (5'), 98.7 (8), 42.3 (2), 42.1 (5), 26.5 (4), 25.1 (3) |
| 23 |  | 8.41 (d, 1H, $J$ = 5.7 Hz, 9), 8.35 (d, 1H, $J$ = 9.1 Hz, 14), 7.81 (dd, 2H, $J$ = 10.3, 3.9 Hz, 11, 1), 7.74 (s, 1H, 6), 7.50 (dd, 1H, $J$ = 9.0, 2.2 Hz, 13), 7.14 (t, 1H, $J$ = 8.1 Hz, 8'), 6.77 (dd, 1H, $J$ = 7.8, 0.7 Hz, 7'), 6.68 (dd, 1H, $J$ = 7.8, 0.7 Hz, 9'), 6.56 (d, 1H, $J$ = 5.8 Hz, 8), 6.20 (s, 2H, 11'), 3.46 – 3.23 (m, 4H, 2, 5), 1.80 – 1.68 (m, 4H, 3, 4)                              | 162.9 (4'), 154.7 (1'), 151.5 (9), 150.7 (10), 150.2 (7), 147.6 (10), 134.7 (8'), 133.1 (12), 132.2 (6'), 126.4 (11), 125.0 (13), 124.9 (14), 117.6 (9'), 117.0 (15), 114.5 (7'), 106.3 (5'), 99.1 (8), 42.8 (2), 42.7 (5), 26.9 (3), 25.6 (4)      |

na-not available

Figure S1. IR, MS and/or NMR spectra of compounds 2, 4a, 5a, 5d, 6, 8, 9, 11, 12, 14–23.

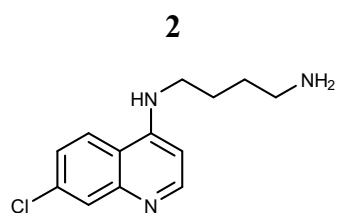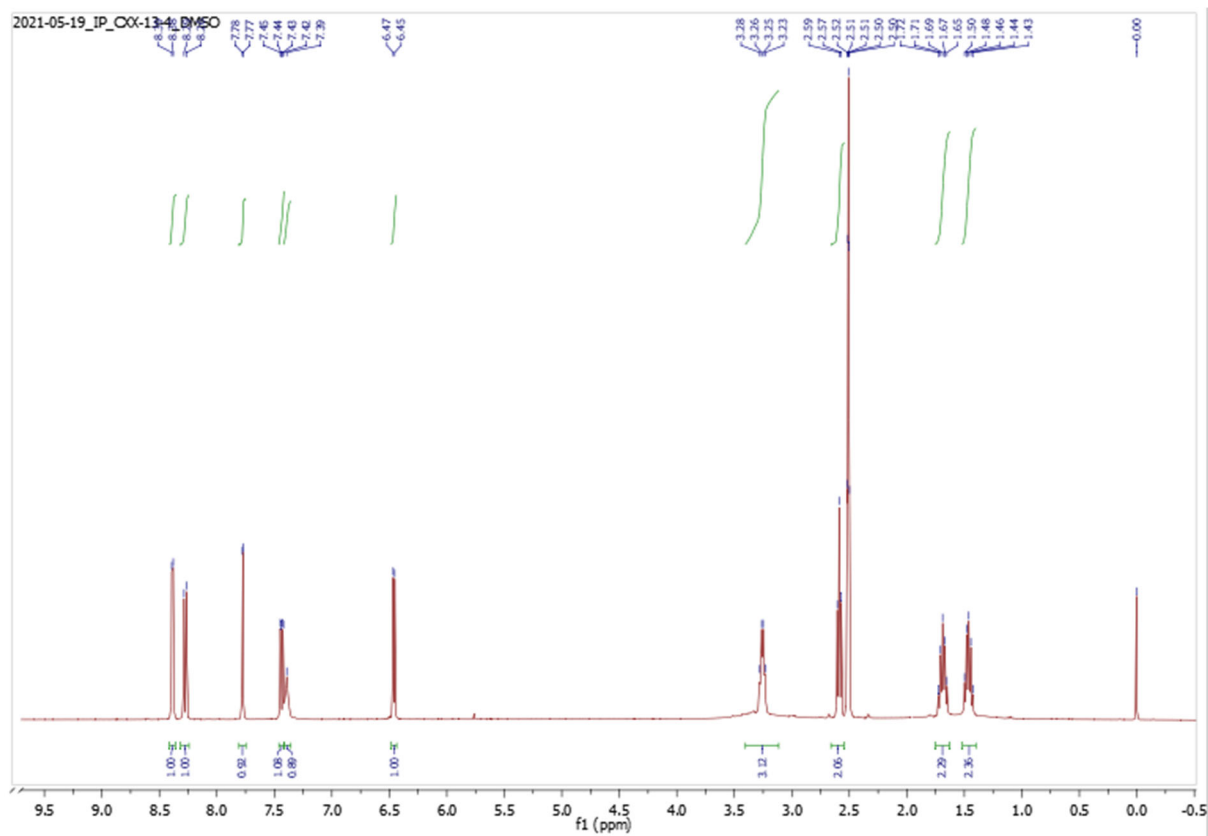

**4a**

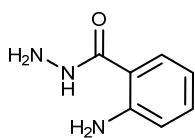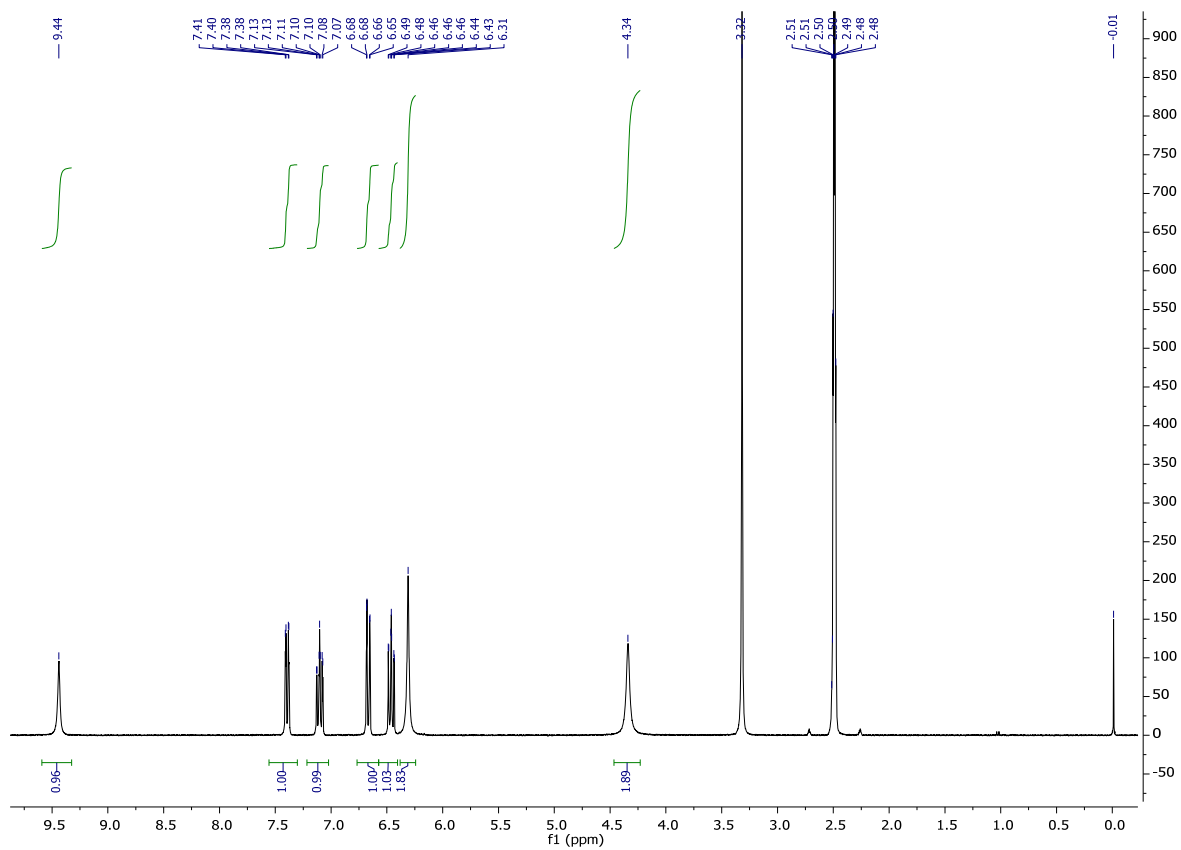

5a

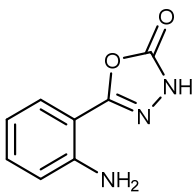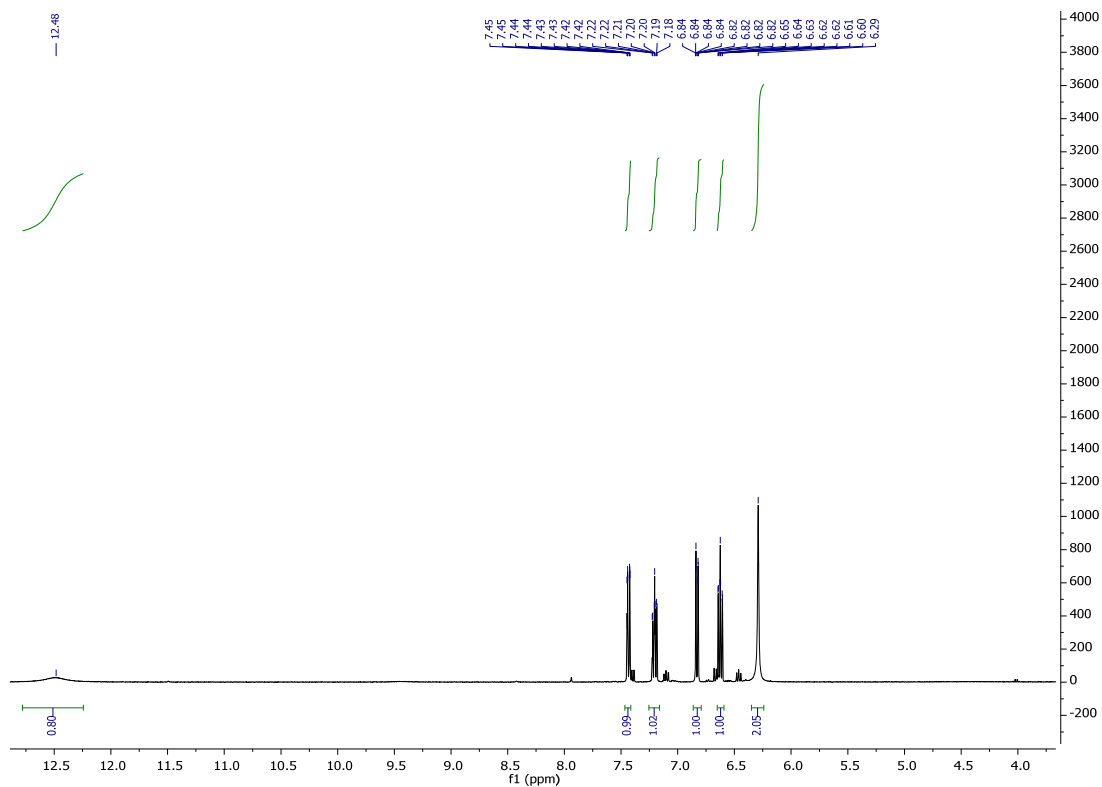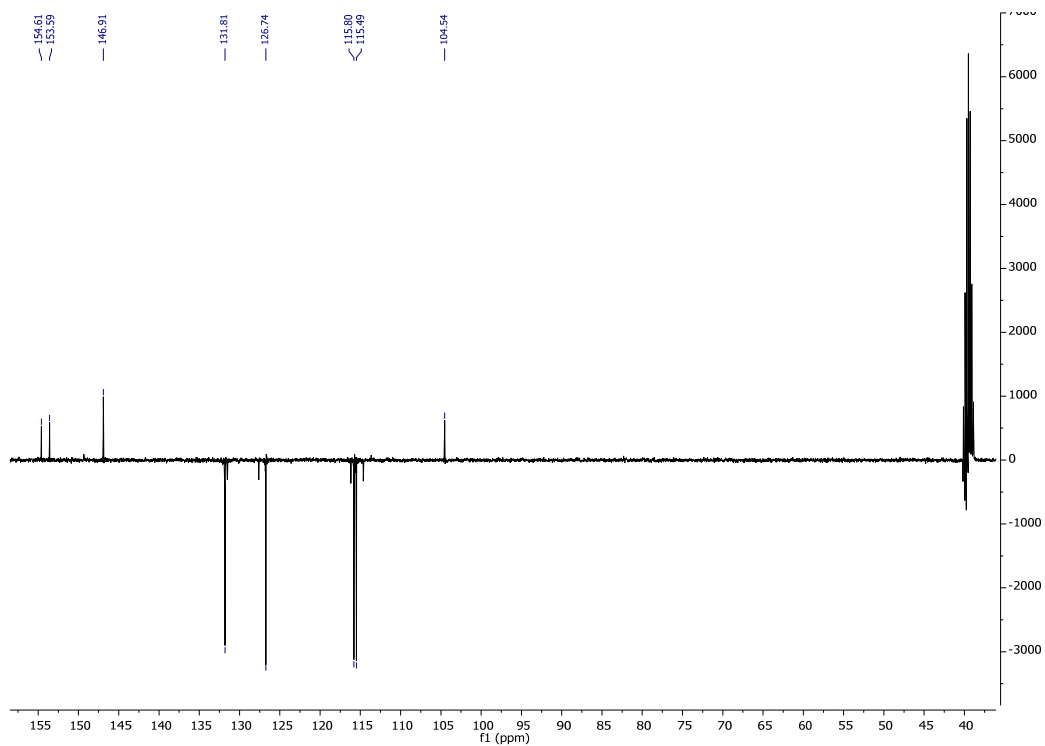



5d

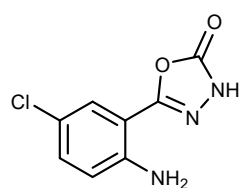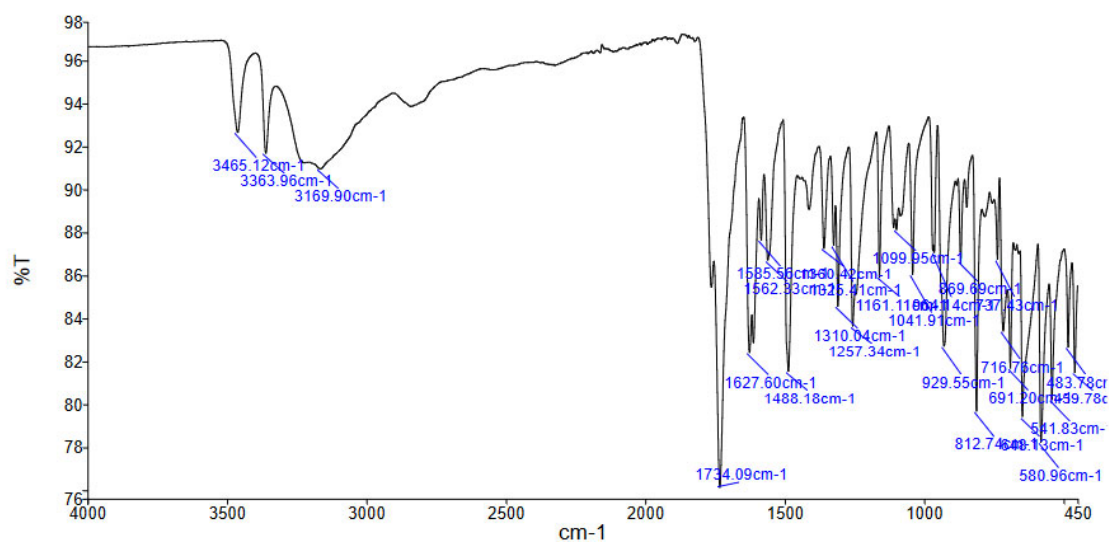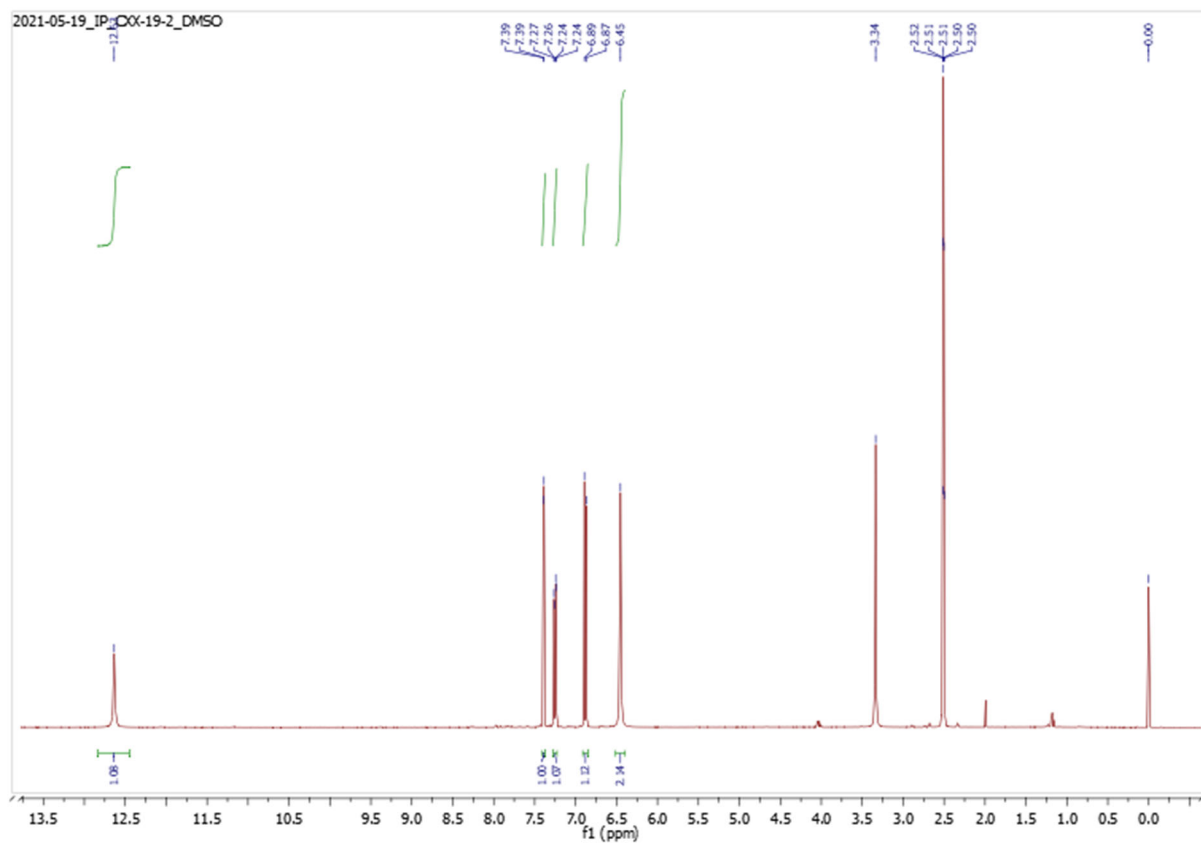

6

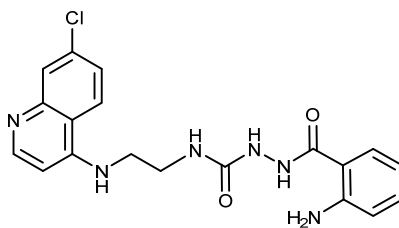

Peak ID Compound Time Mass Found  
1 0.61  
SAMPLE: 2:13 Combine (68:80-(50:55+93:98))

1:MS ES+  
4.0e+006

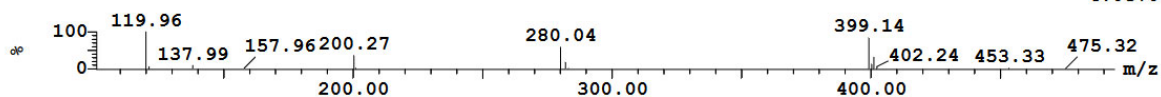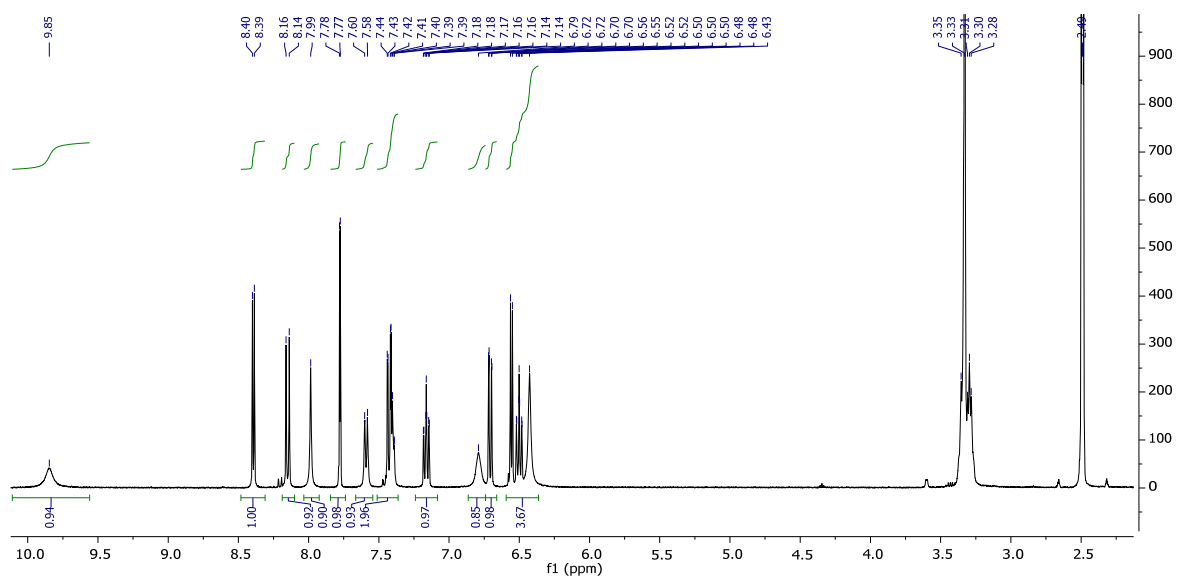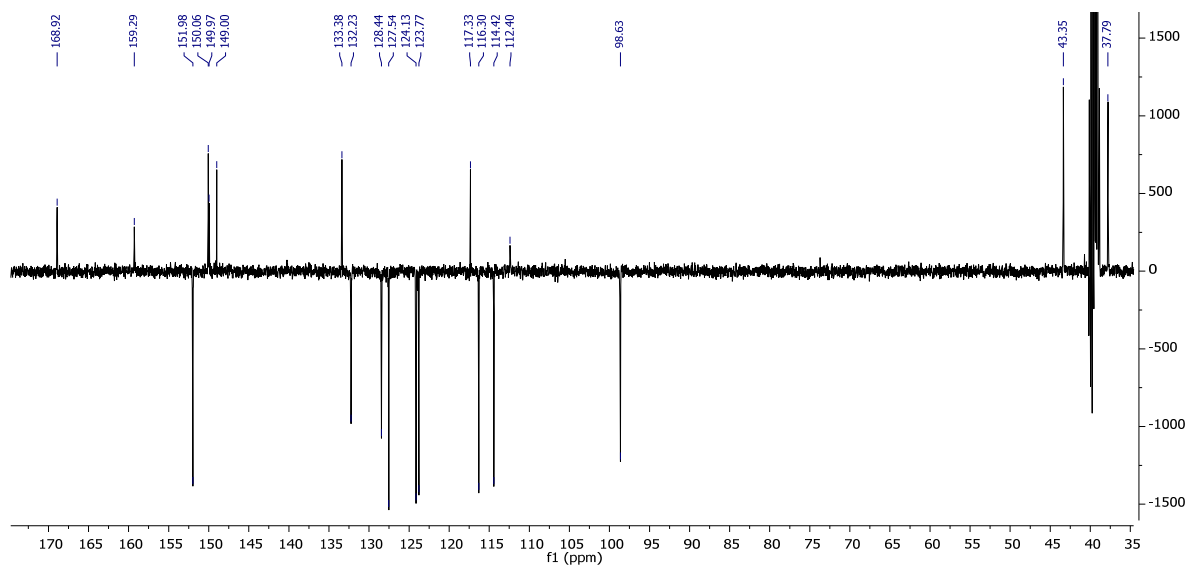

8

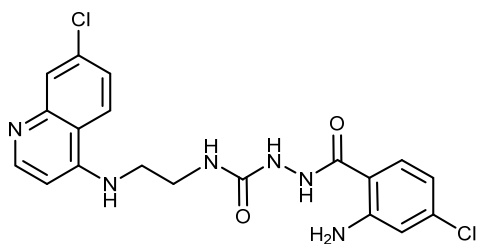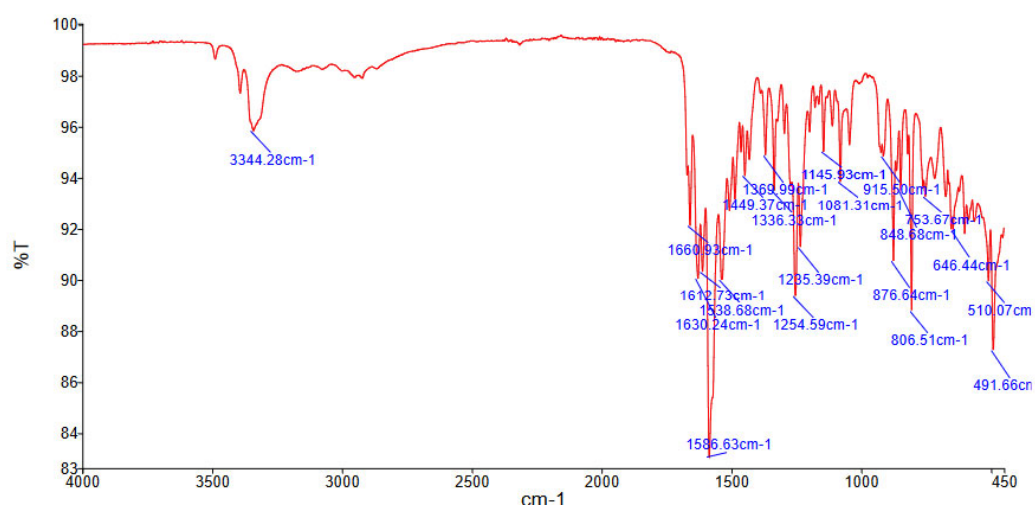

SAMPLE: 1:27 Combine (75:87-(57:62+100:105))

2:MS ES-  
1.8e+005

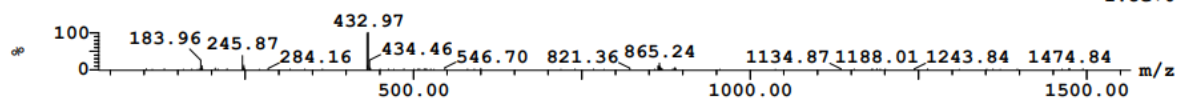

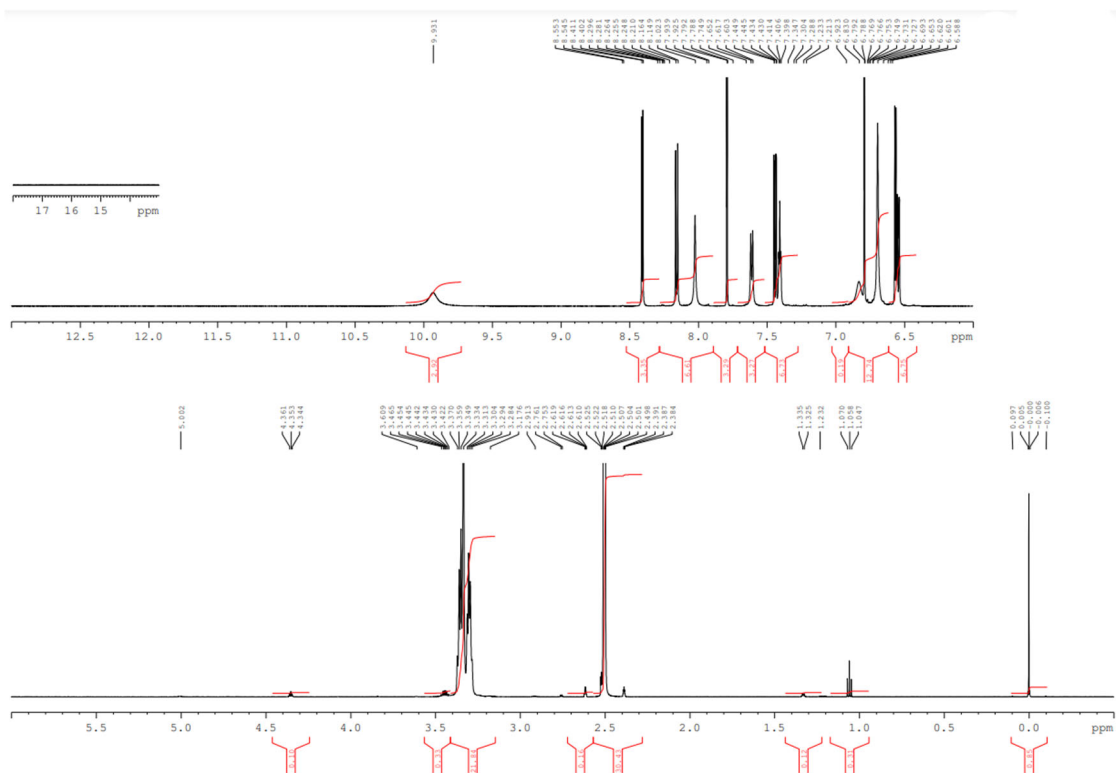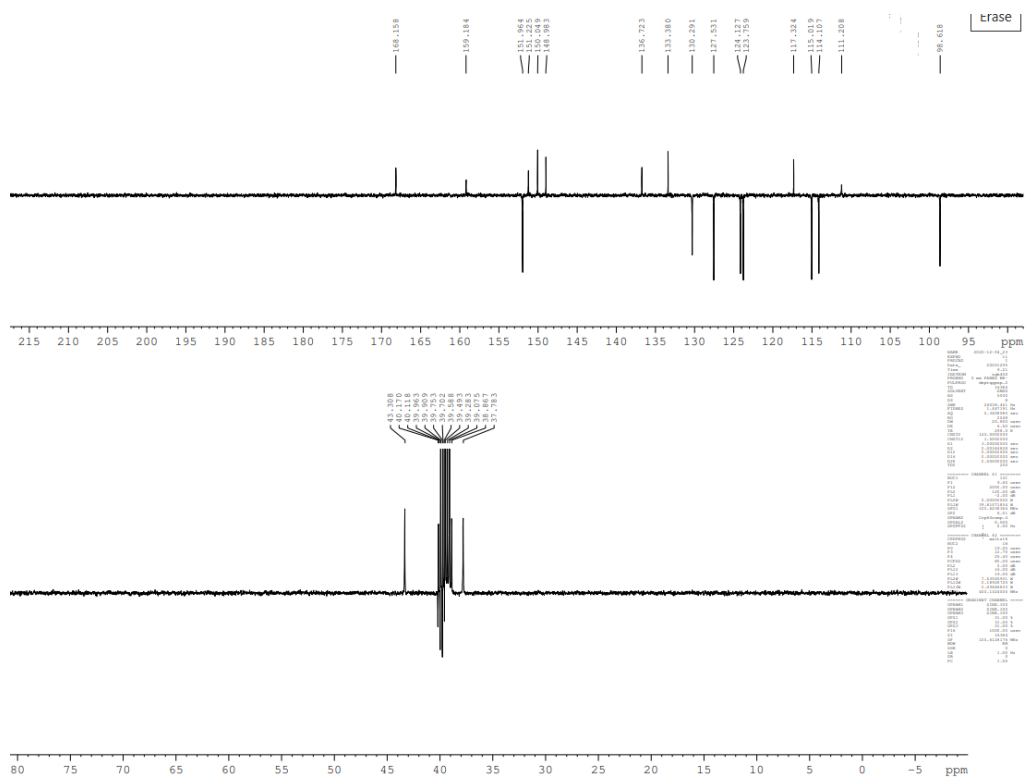

9

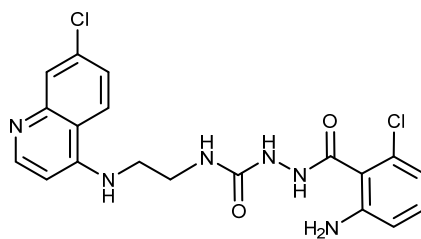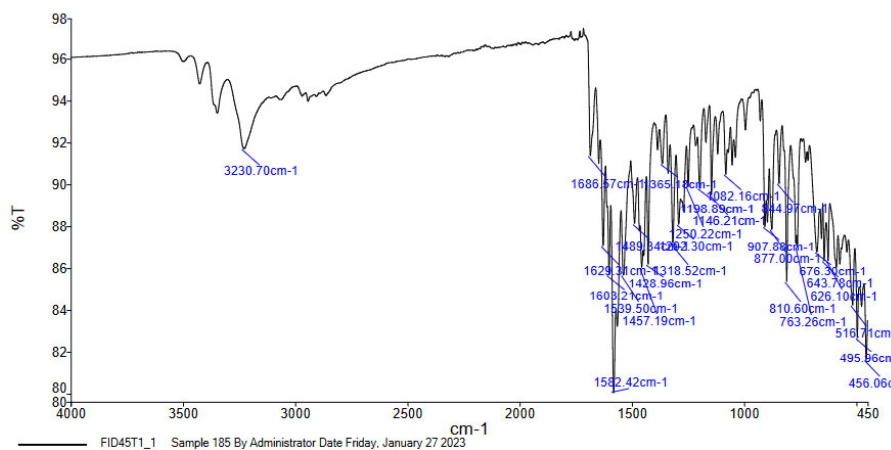

| Peak ID | Compound | Time | Mass Found |
|---------|----------|------|------------|
| 3       |          | 0.69 |            |

SAMPLE: 2:16 Combine (77:89-(59:64+102:107))

1:MS ES+  
1.8e+007

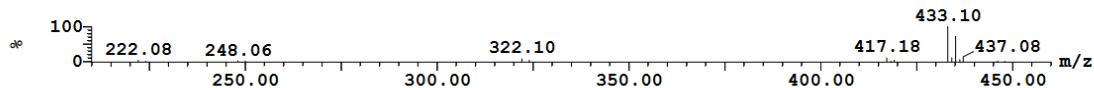

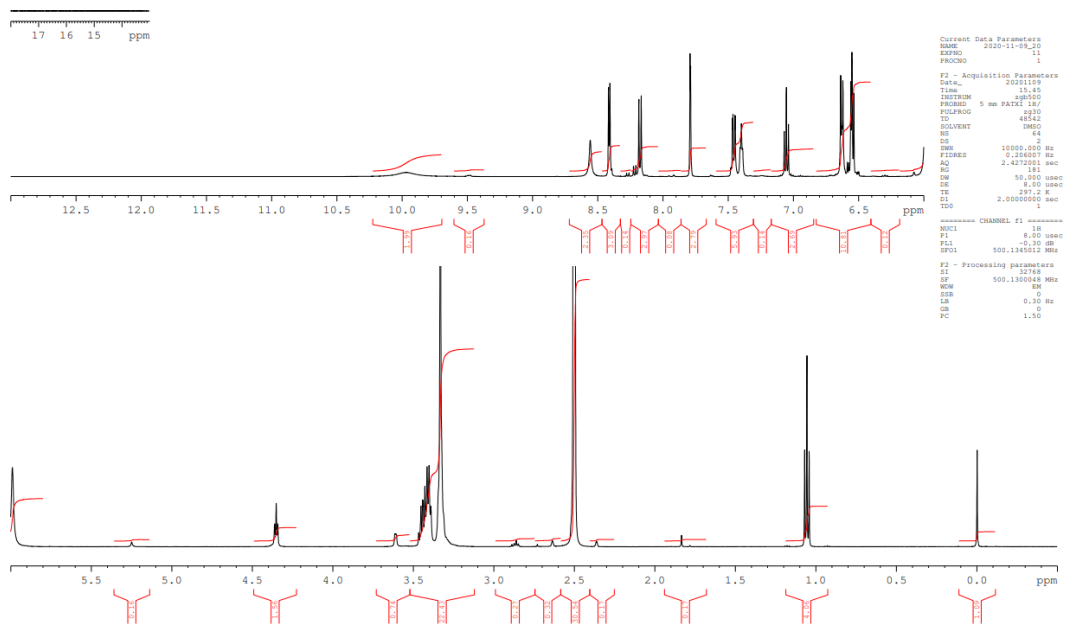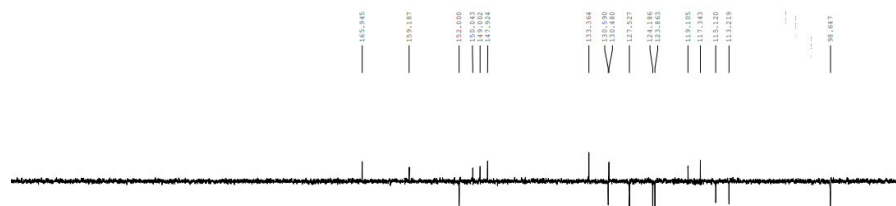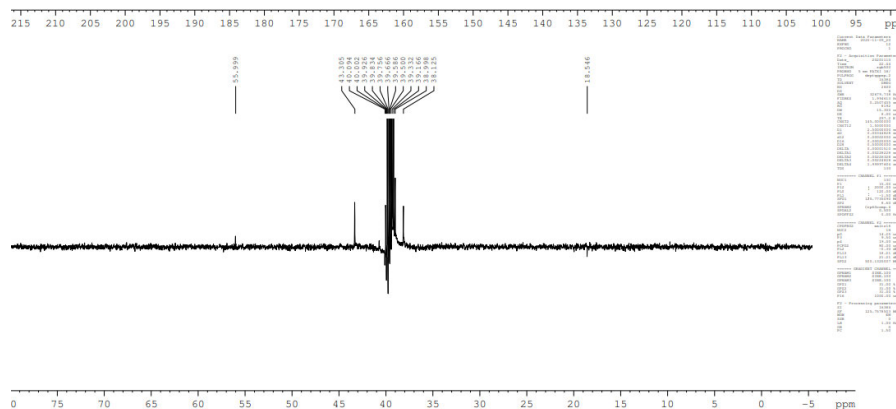

11

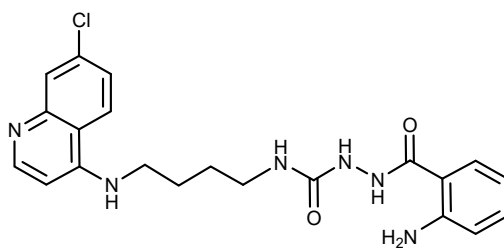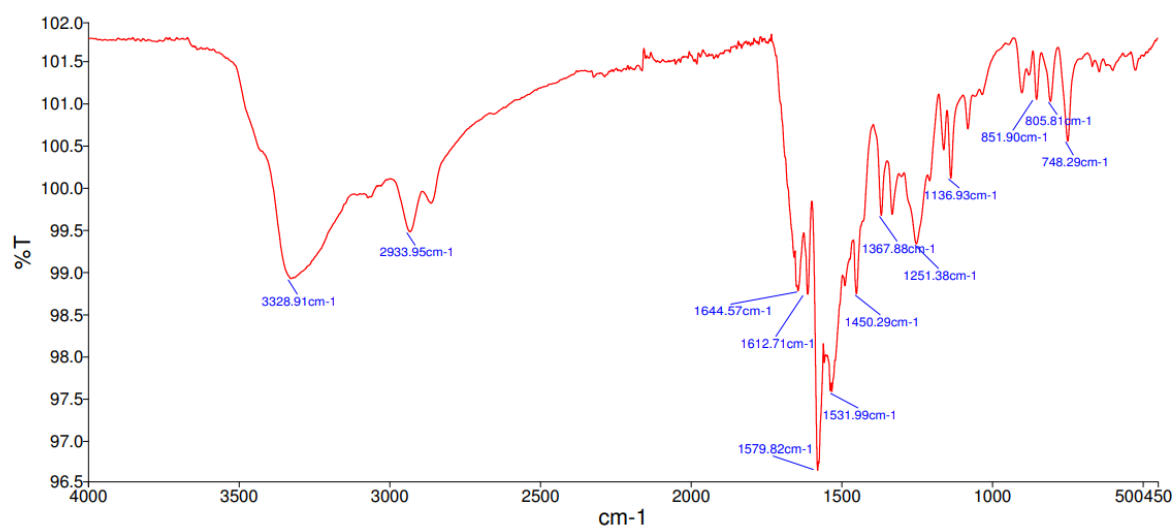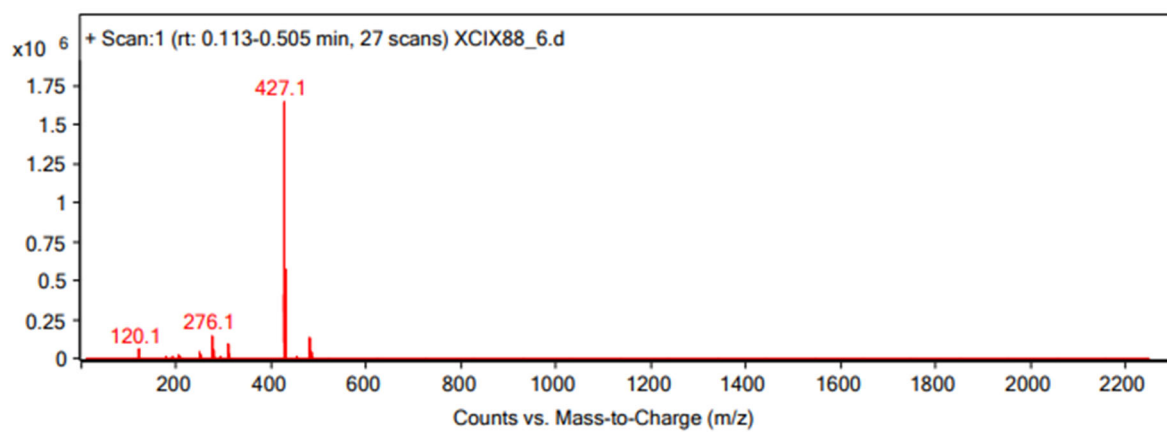

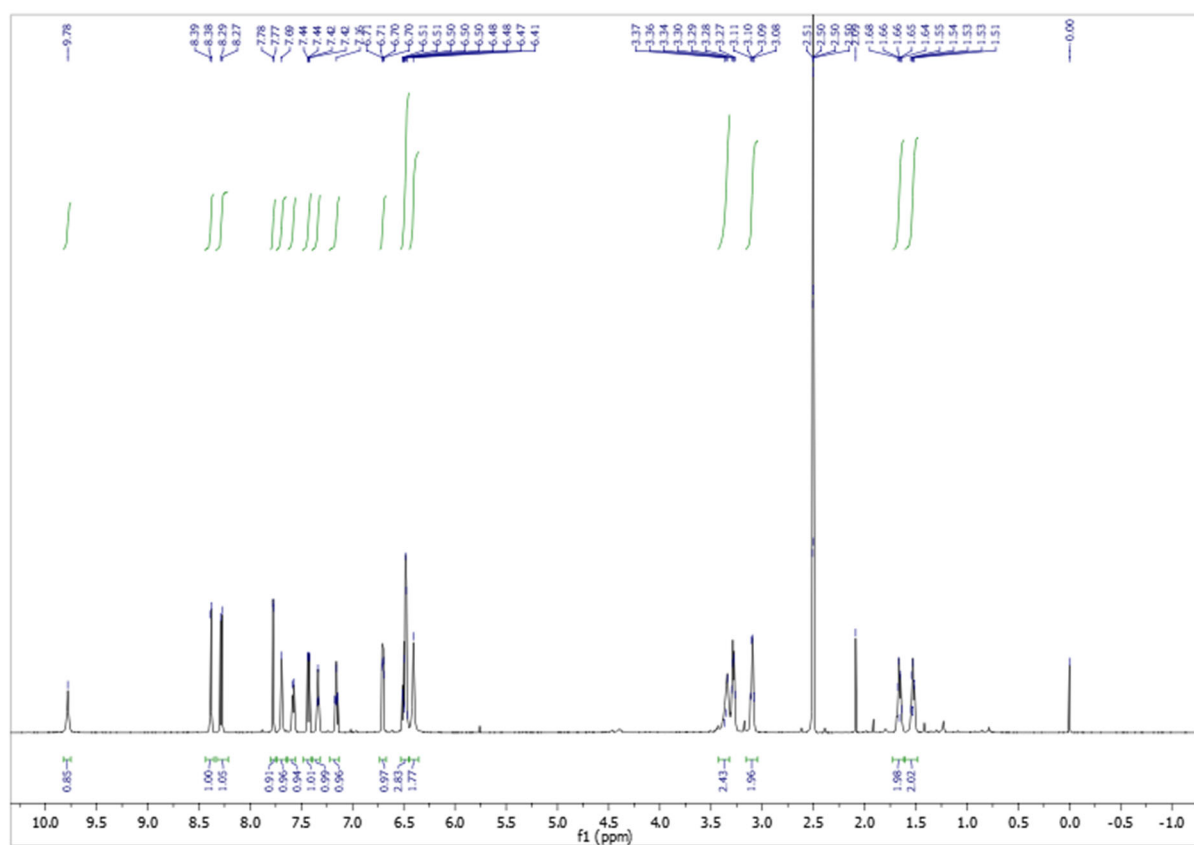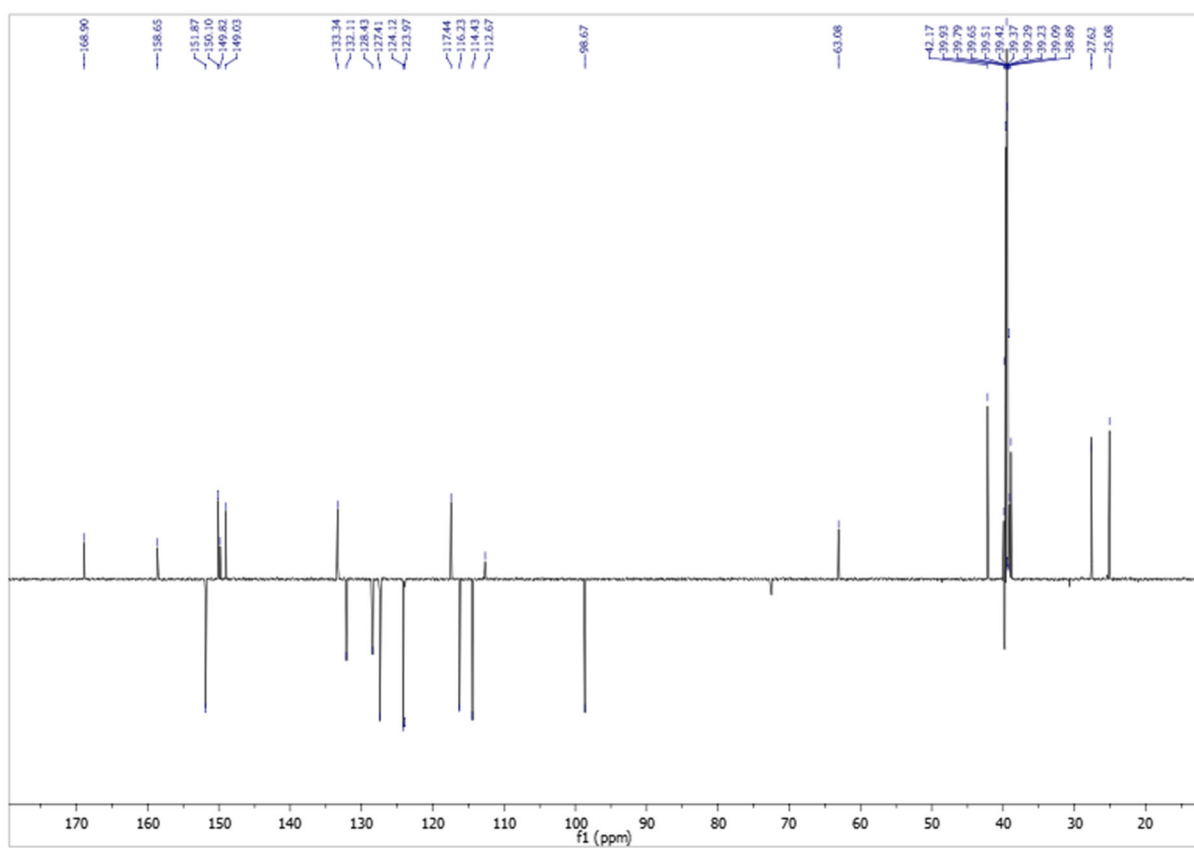



12

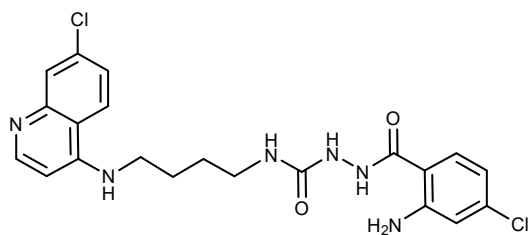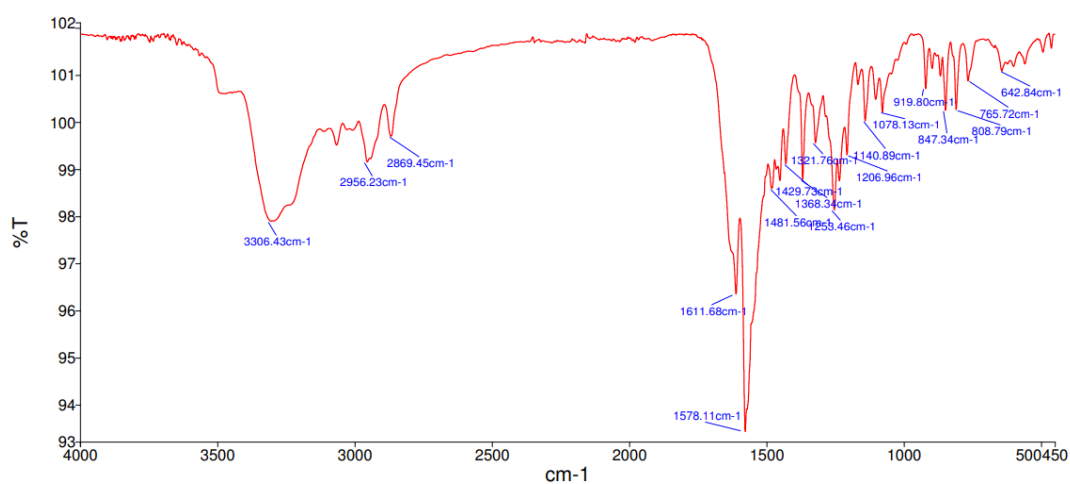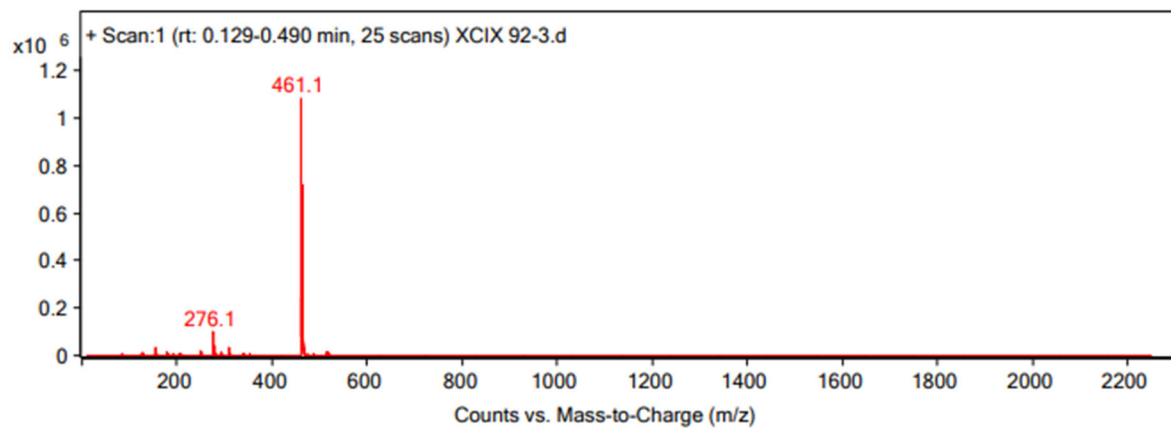

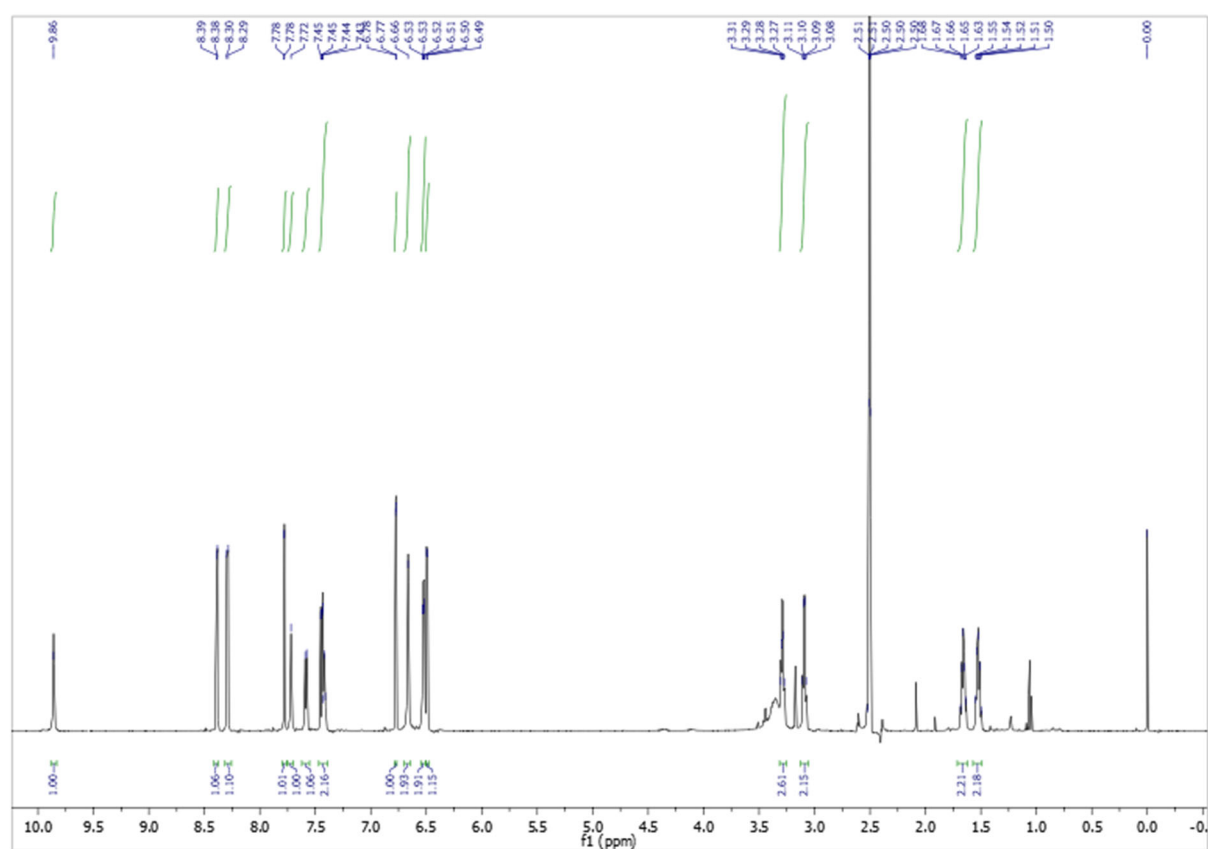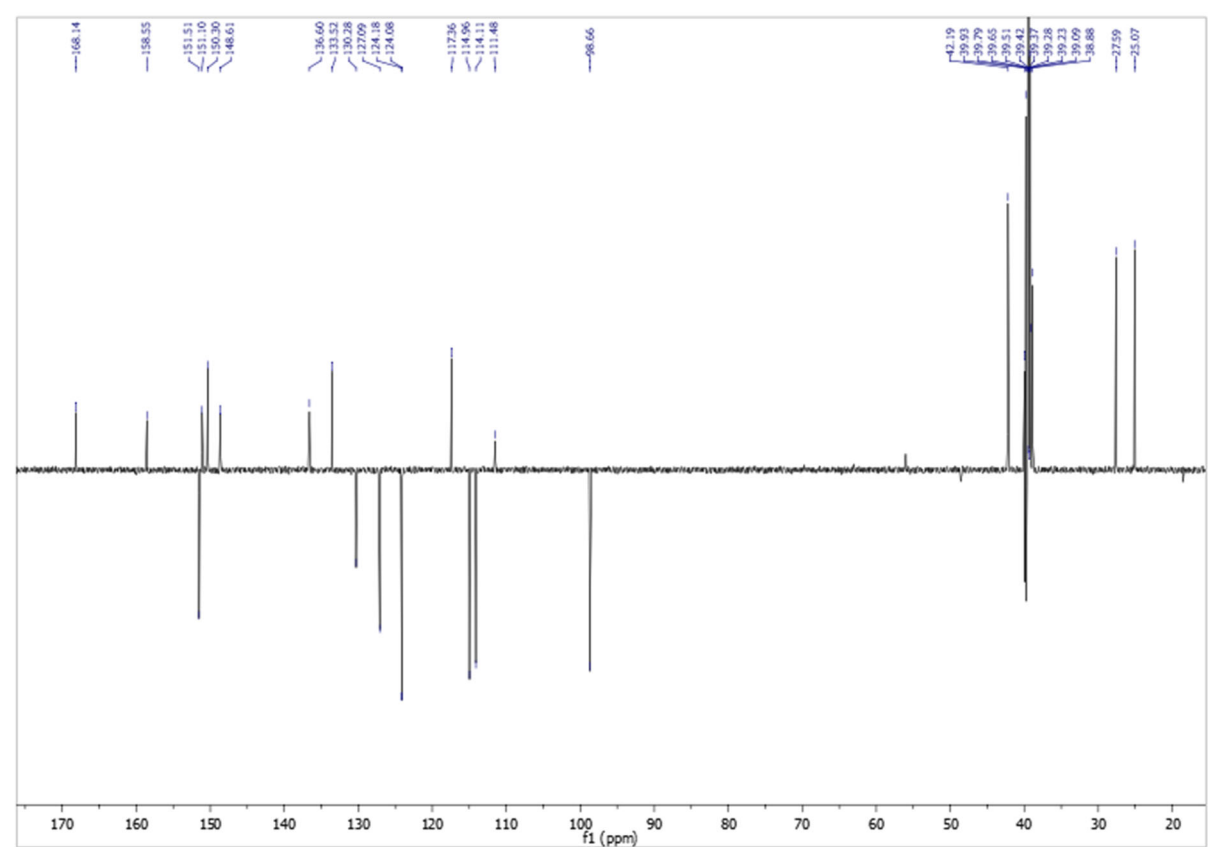

14

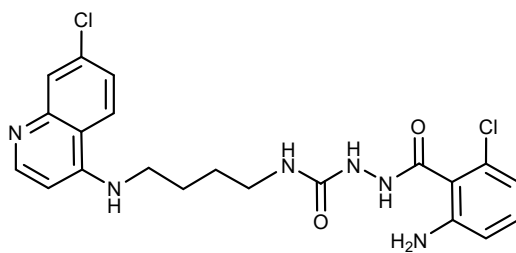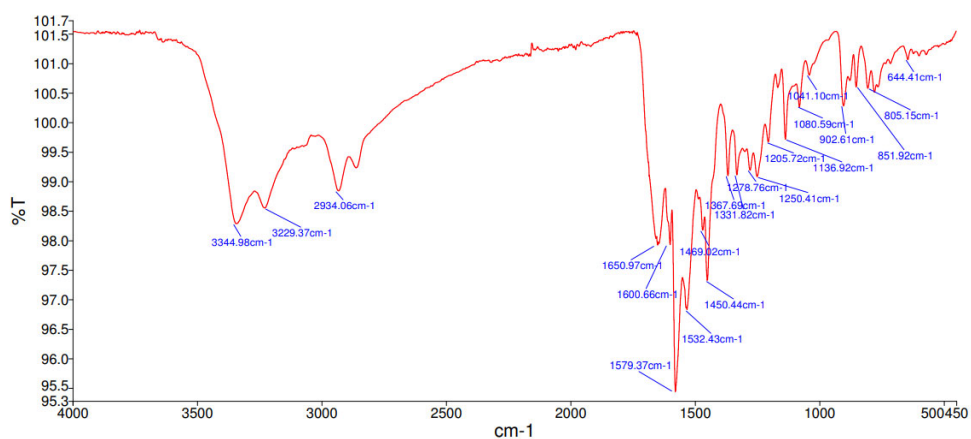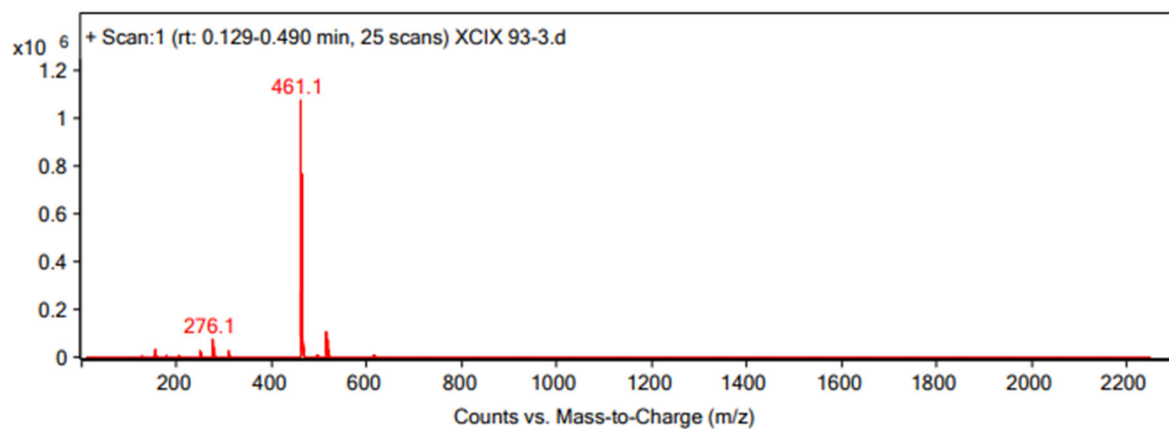

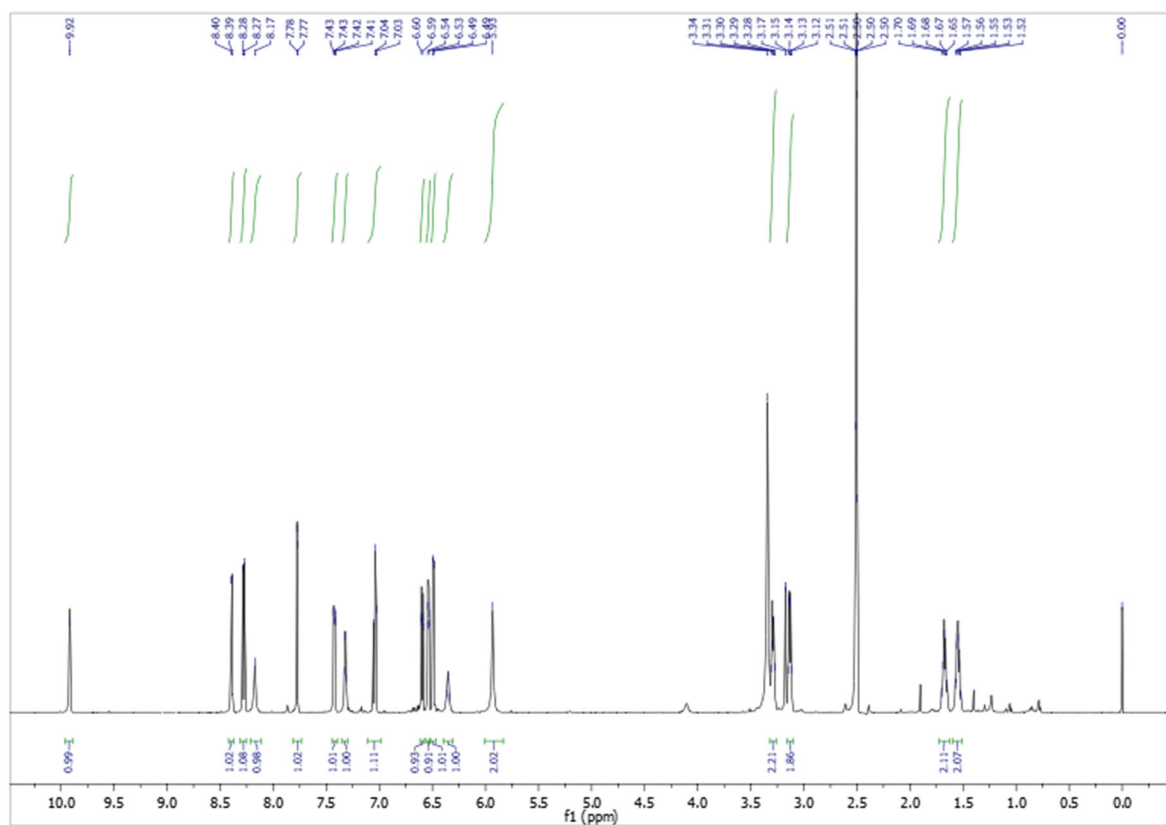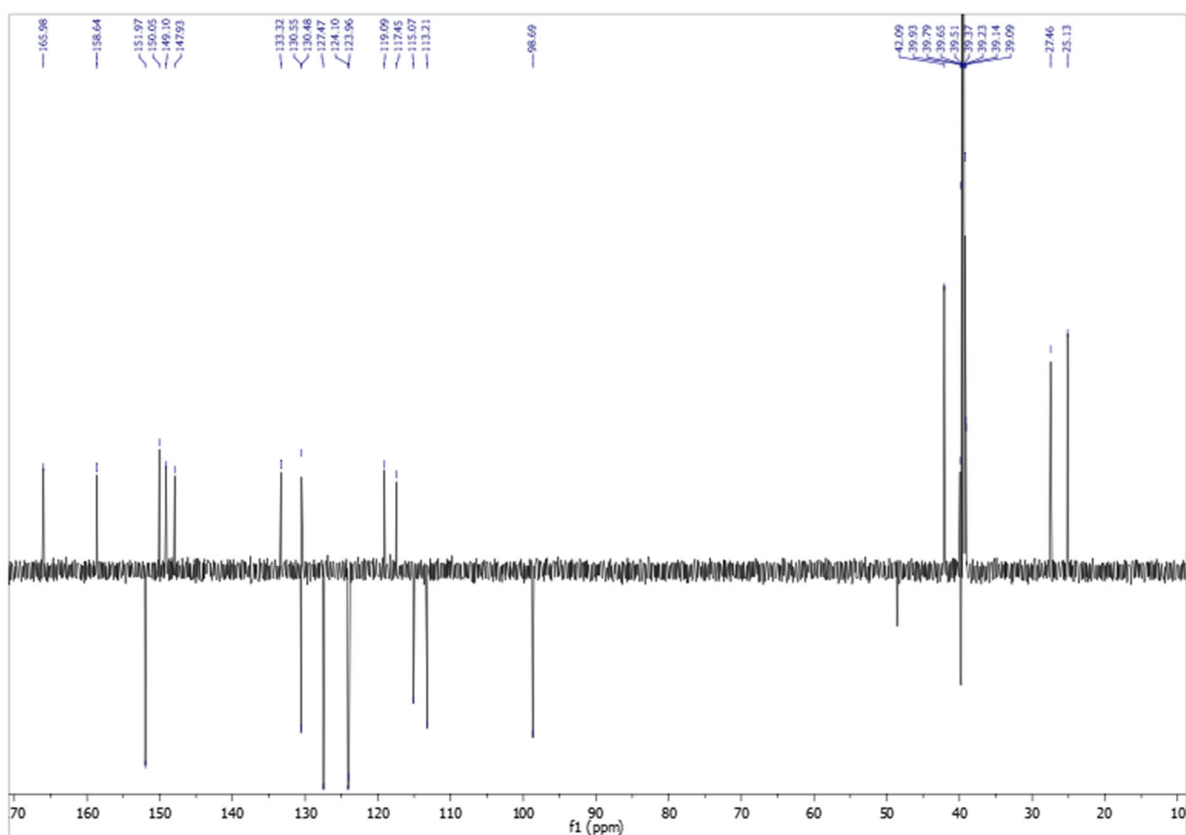

15

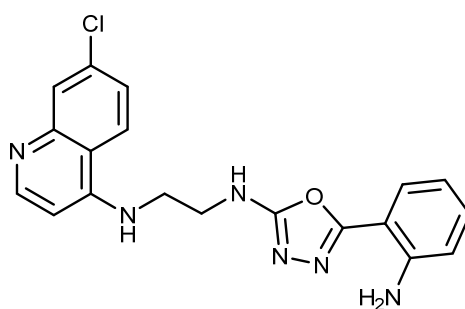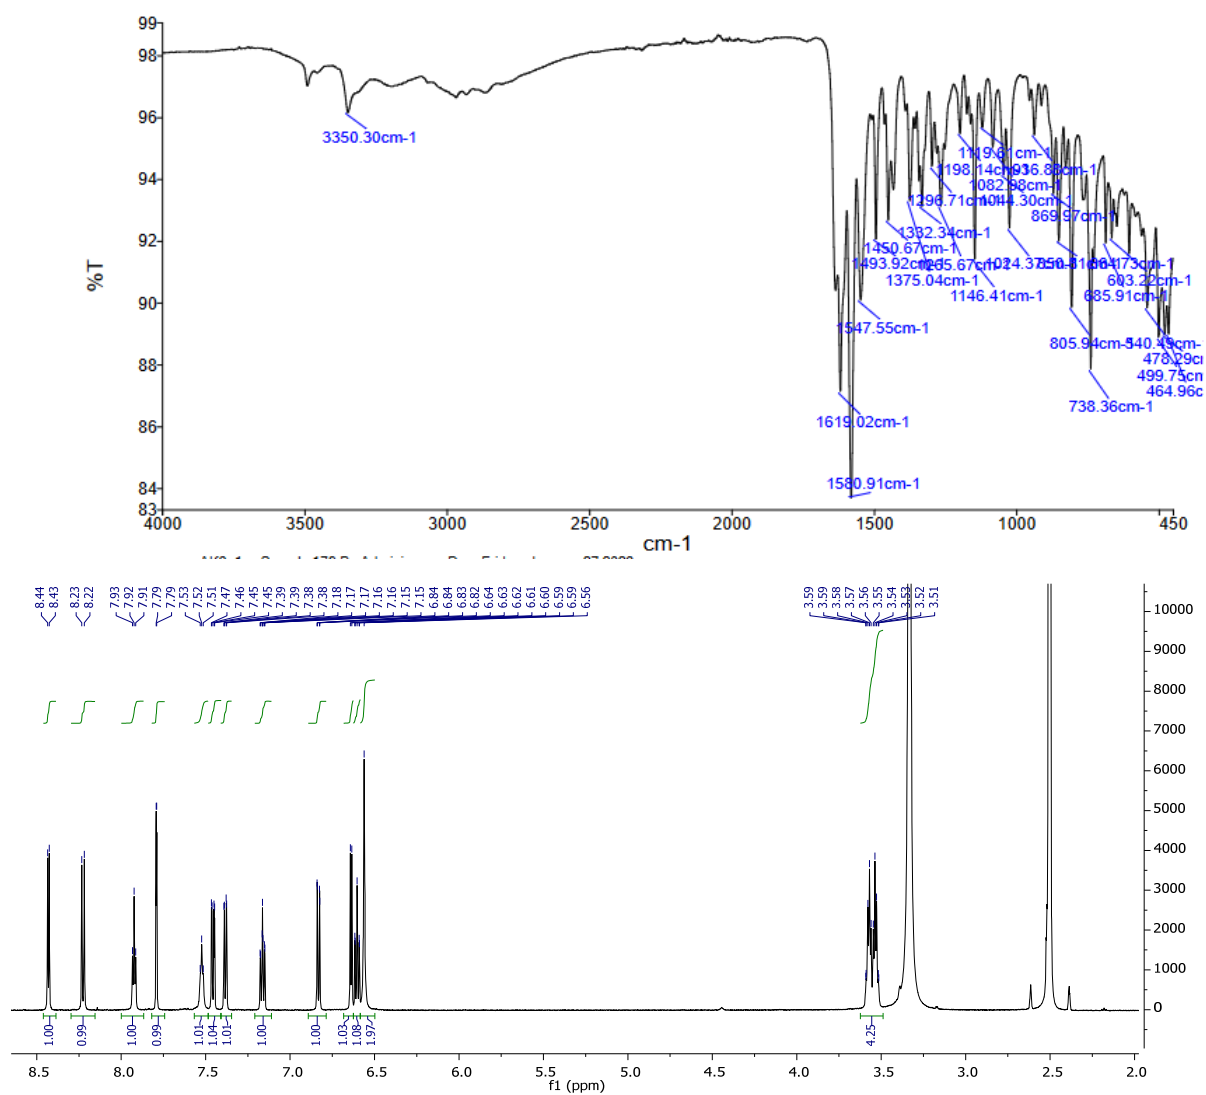

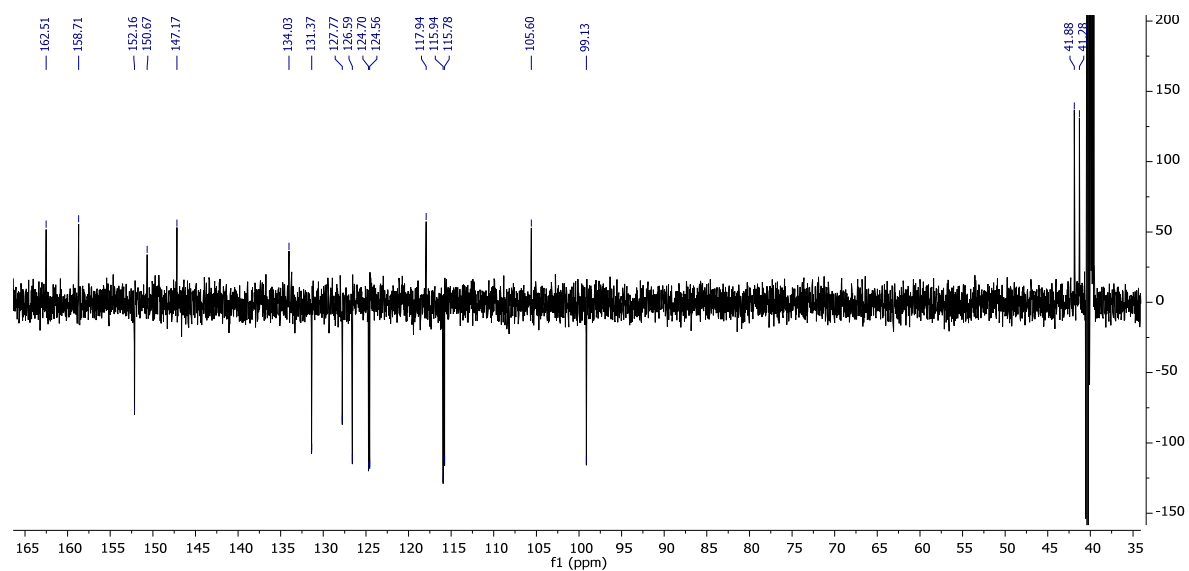

idzajic82-FID1556-023F1-2-UPLC2

1: Scan ES+

TIC

1.65e8

| Time | Height    | Area       | Area% |
|------|-----------|------------|-------|
| 2.68 | 161390640 | 7248889.50 | 100.0 |

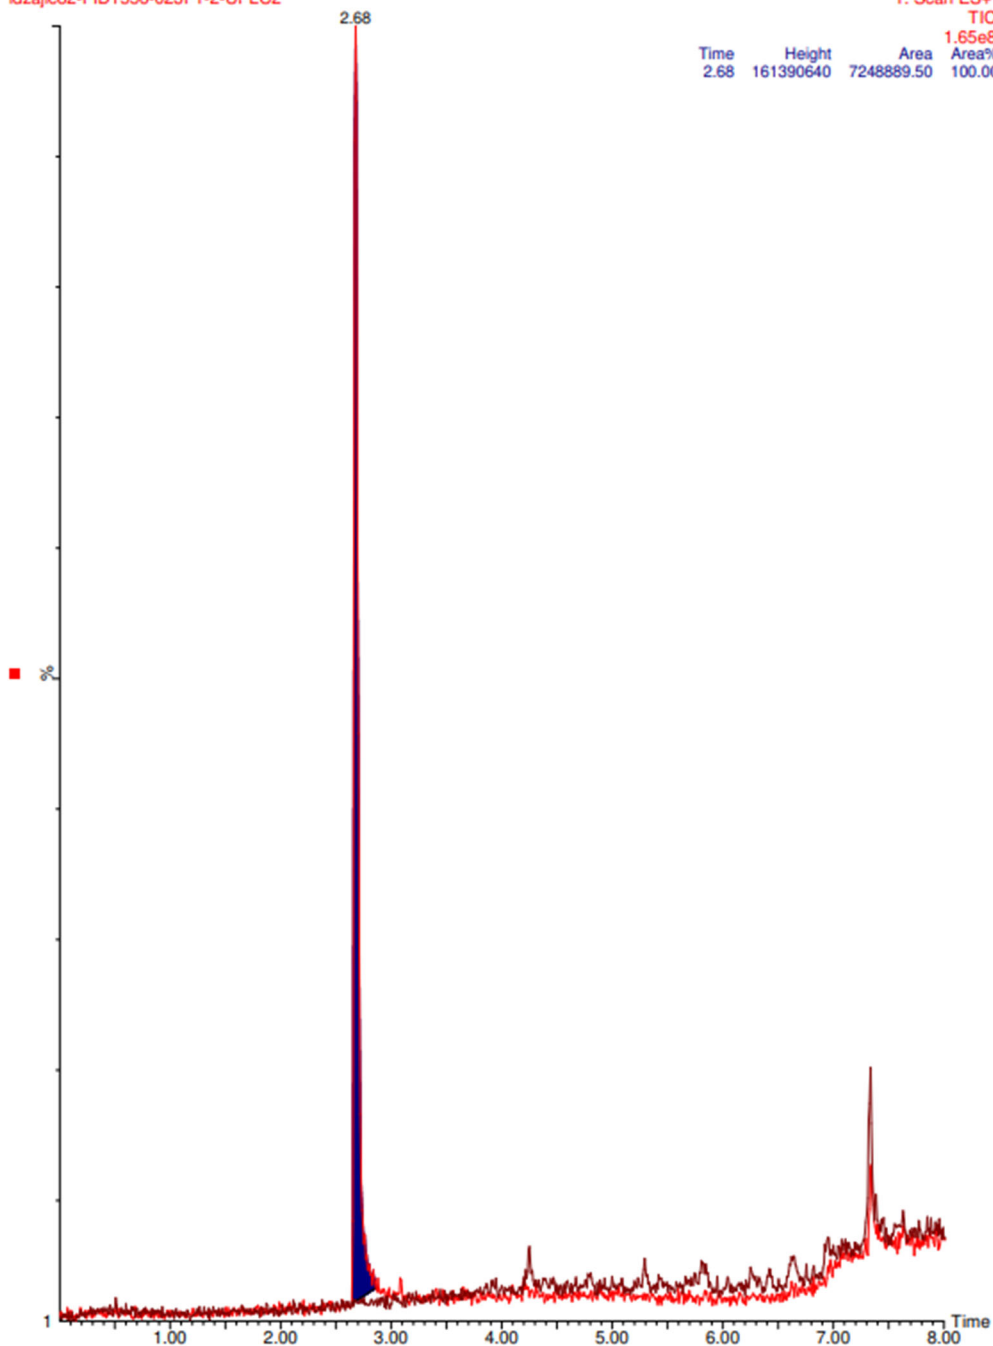

| Peak ID | Compound | Time | Mass Found |
|---------|----------|------|------------|
| 3       |          | 2.68 |            |

SAMPLE: 1:25 Combine (313:325-(295:300+338:343))

1:MS ES+

2.6e+007

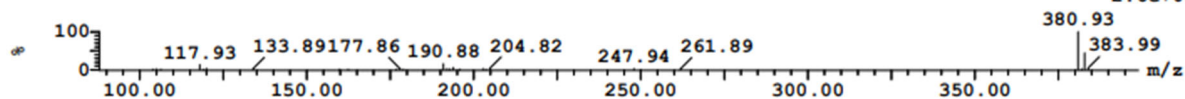

| Peak ID | Compound | Time | Mass Found |
|---------|----------|------|------------|
| 3       |          | 2.68 |            |

SAMPLE: 1:25 Combine (313:325-(295:300+338:343))

2:MS ES-

8.7e+005

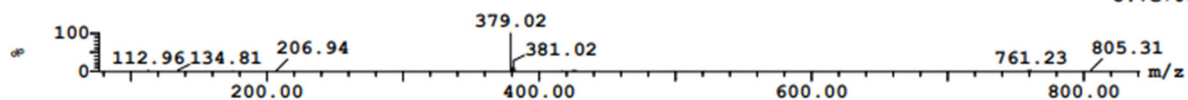

16

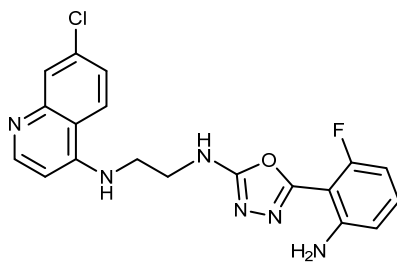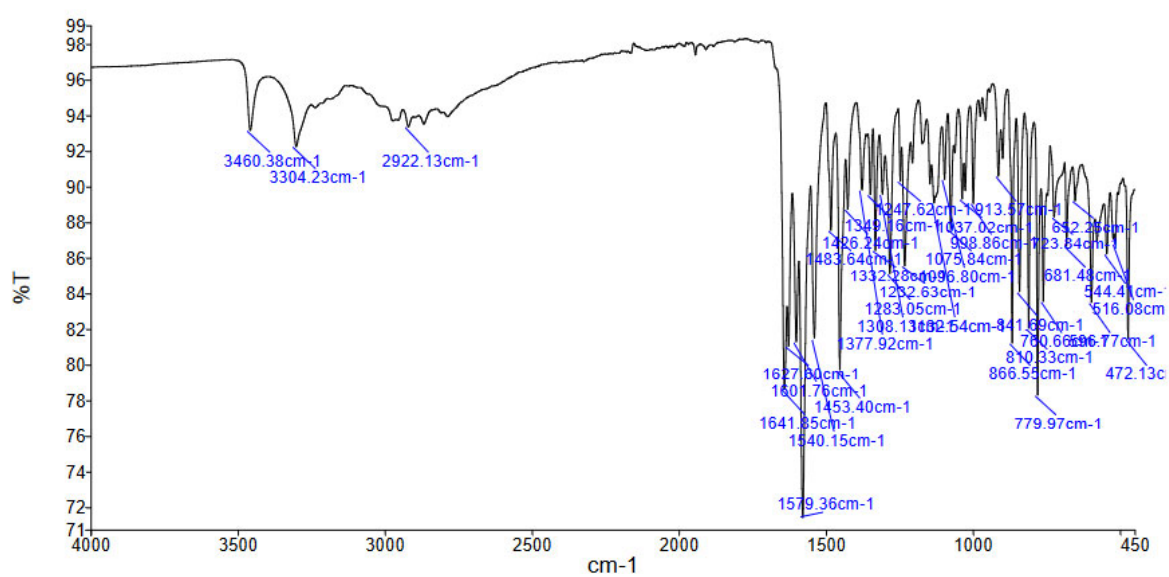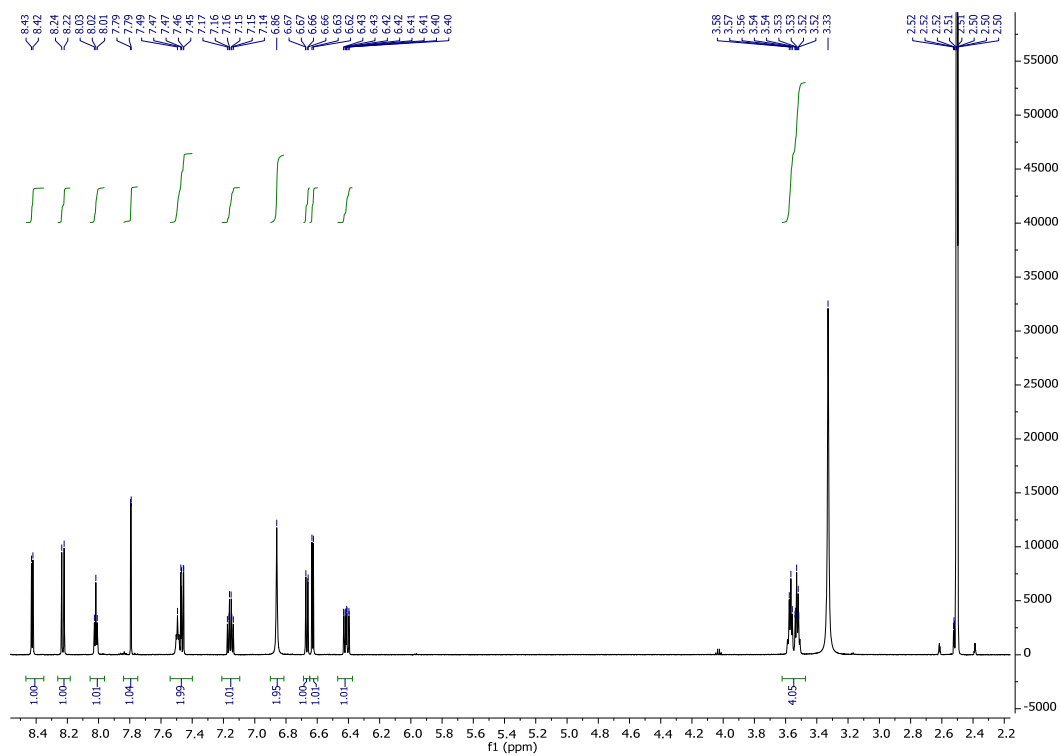



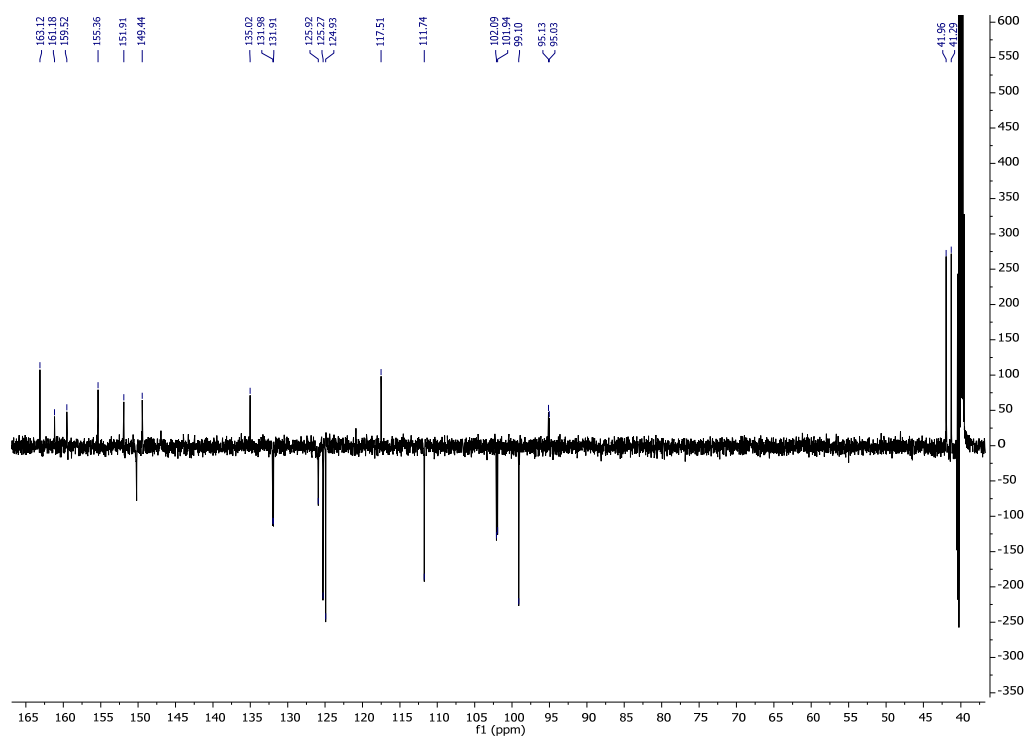

idzajic9-FID1556-048A1-2 Sb (10,10.00)

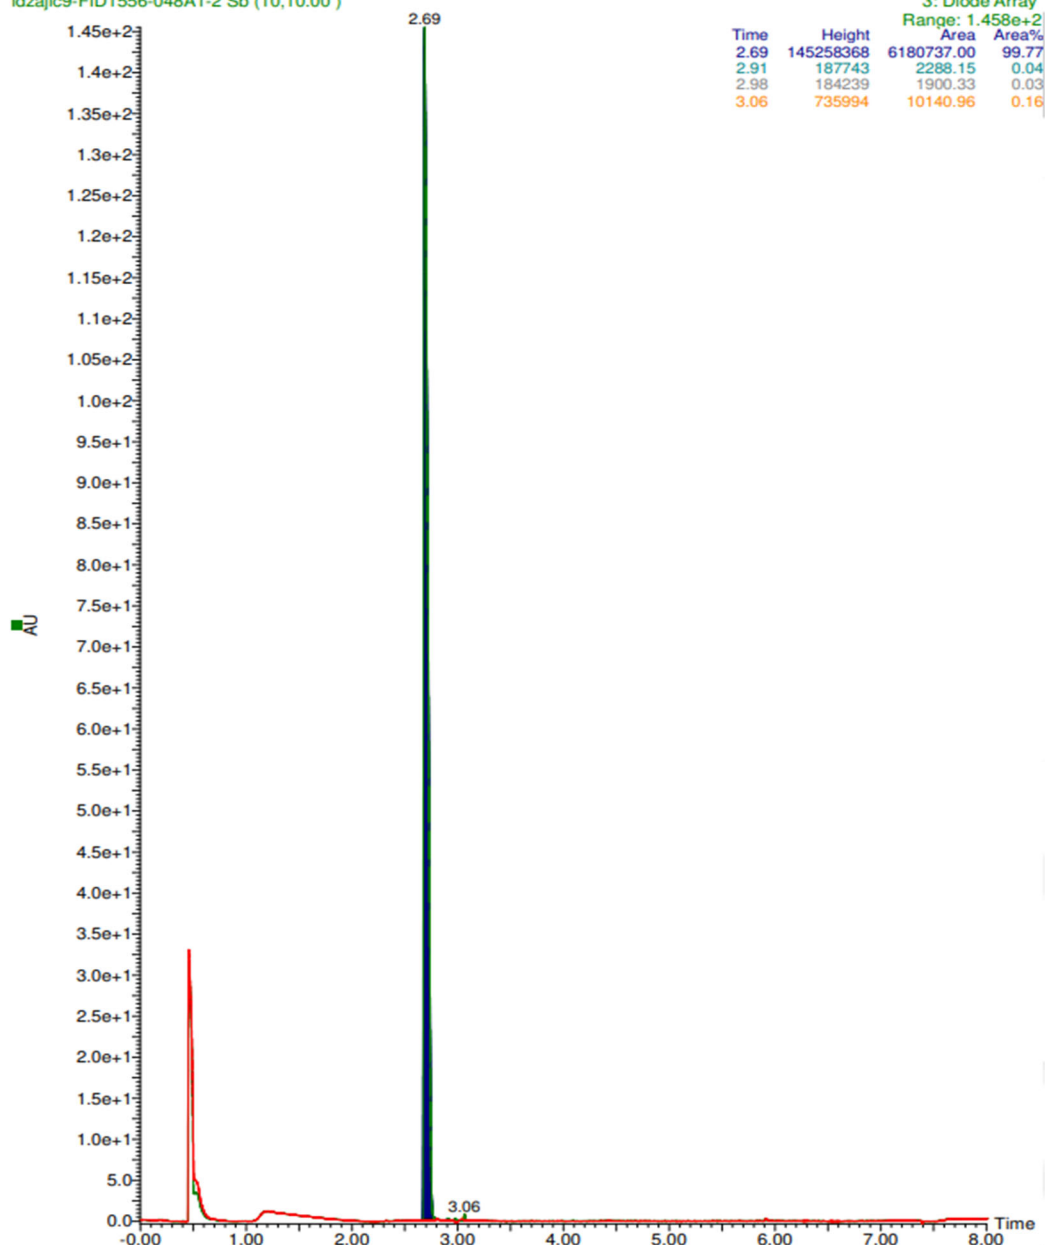

Peak ID Compound Time Mass Found

3 2.71

SAMPLE: 2:20 Combine (317:329-(299:304+342:347))

1:MS ES+  
1.9e+007

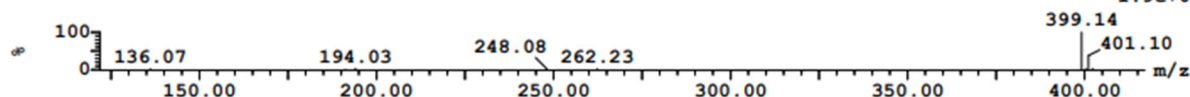

Peak ID Compound Time Mass Found

3 2.71

SAMPLE: 2:20 Combine (317:329-(299:304+342:347))

2:MS ES-  
9.8e+005

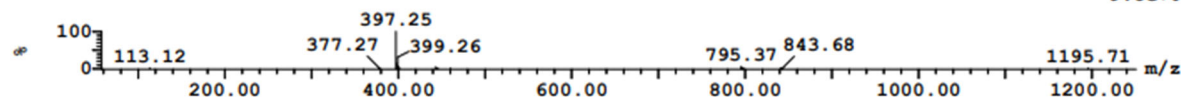

17

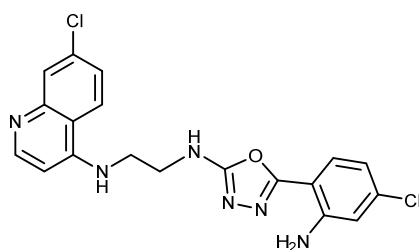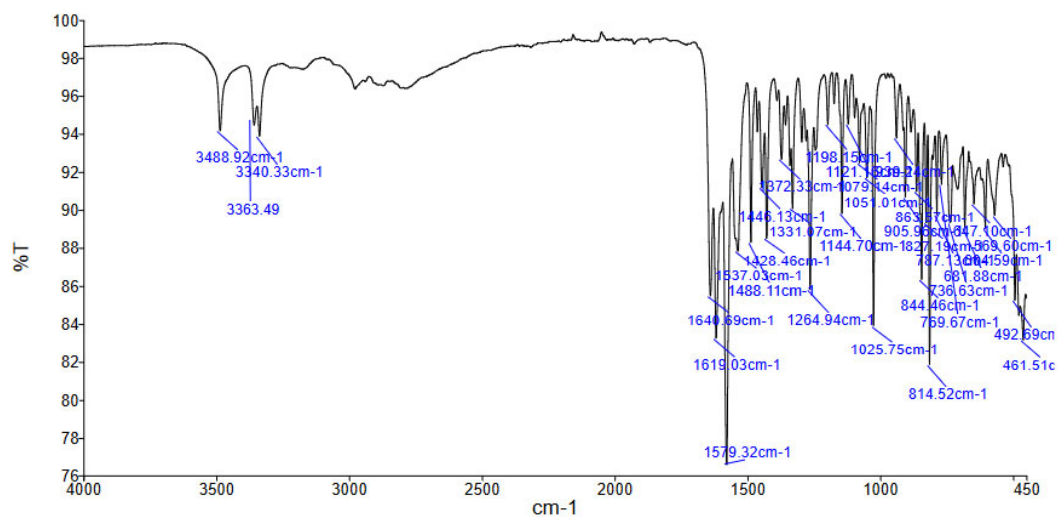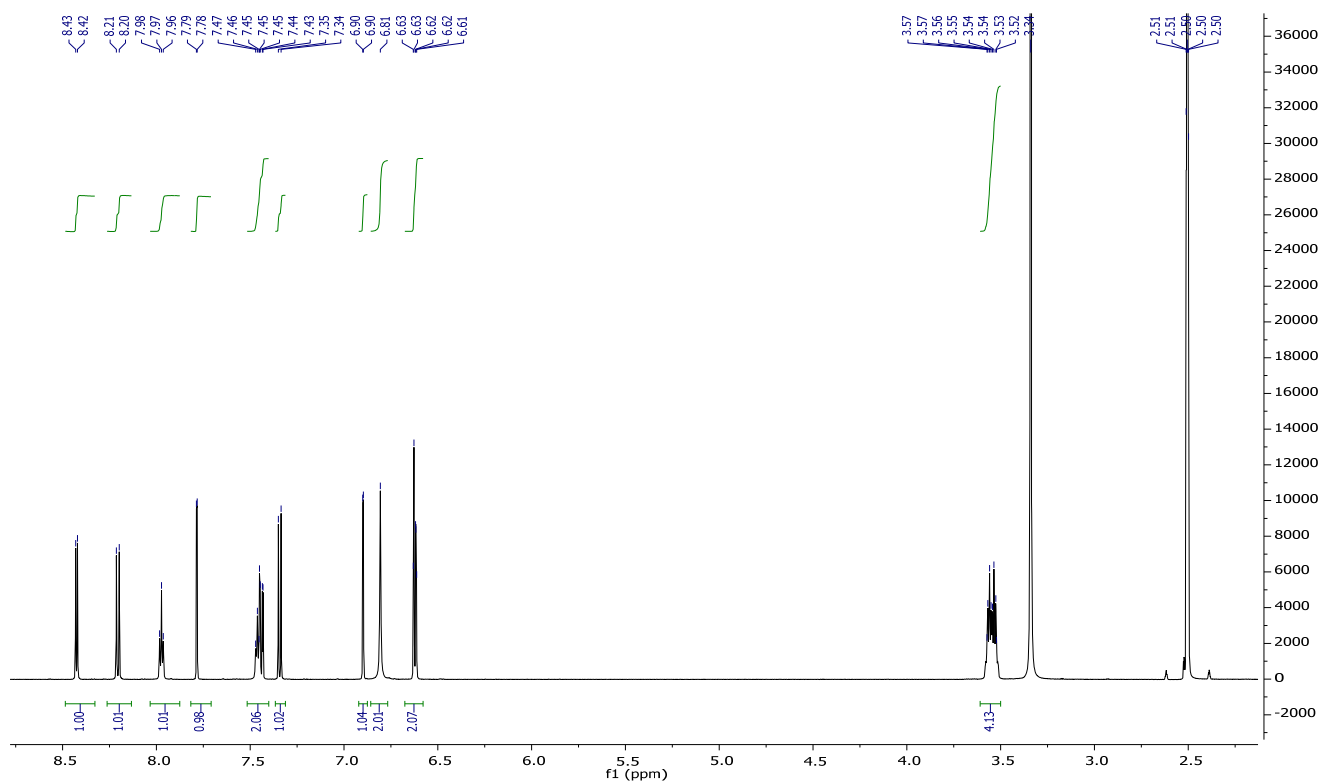

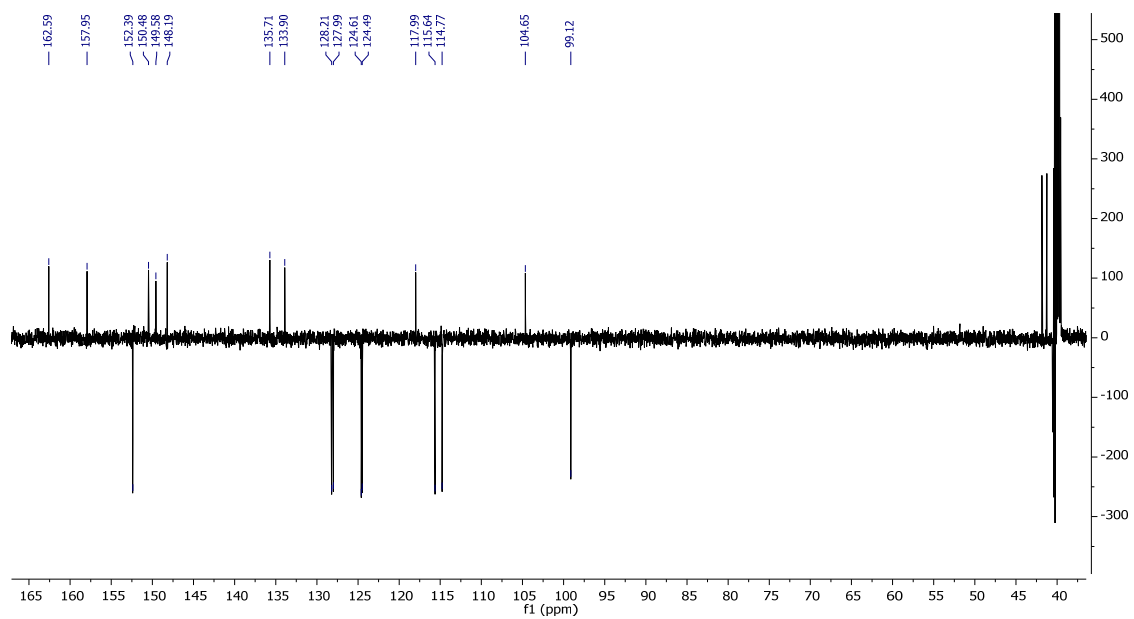

ldzajic84-FID1556-030T1-2-UPLC2

1: Scan ES+  
TIC

| Time | Height    | Area        | Area% |
|------|-----------|-------------|-------|
| 3.06 | 200770832 | 10507139.00 | 99.19 |
| 3.51 | 3391244   | 85890.11    | 0.81  |

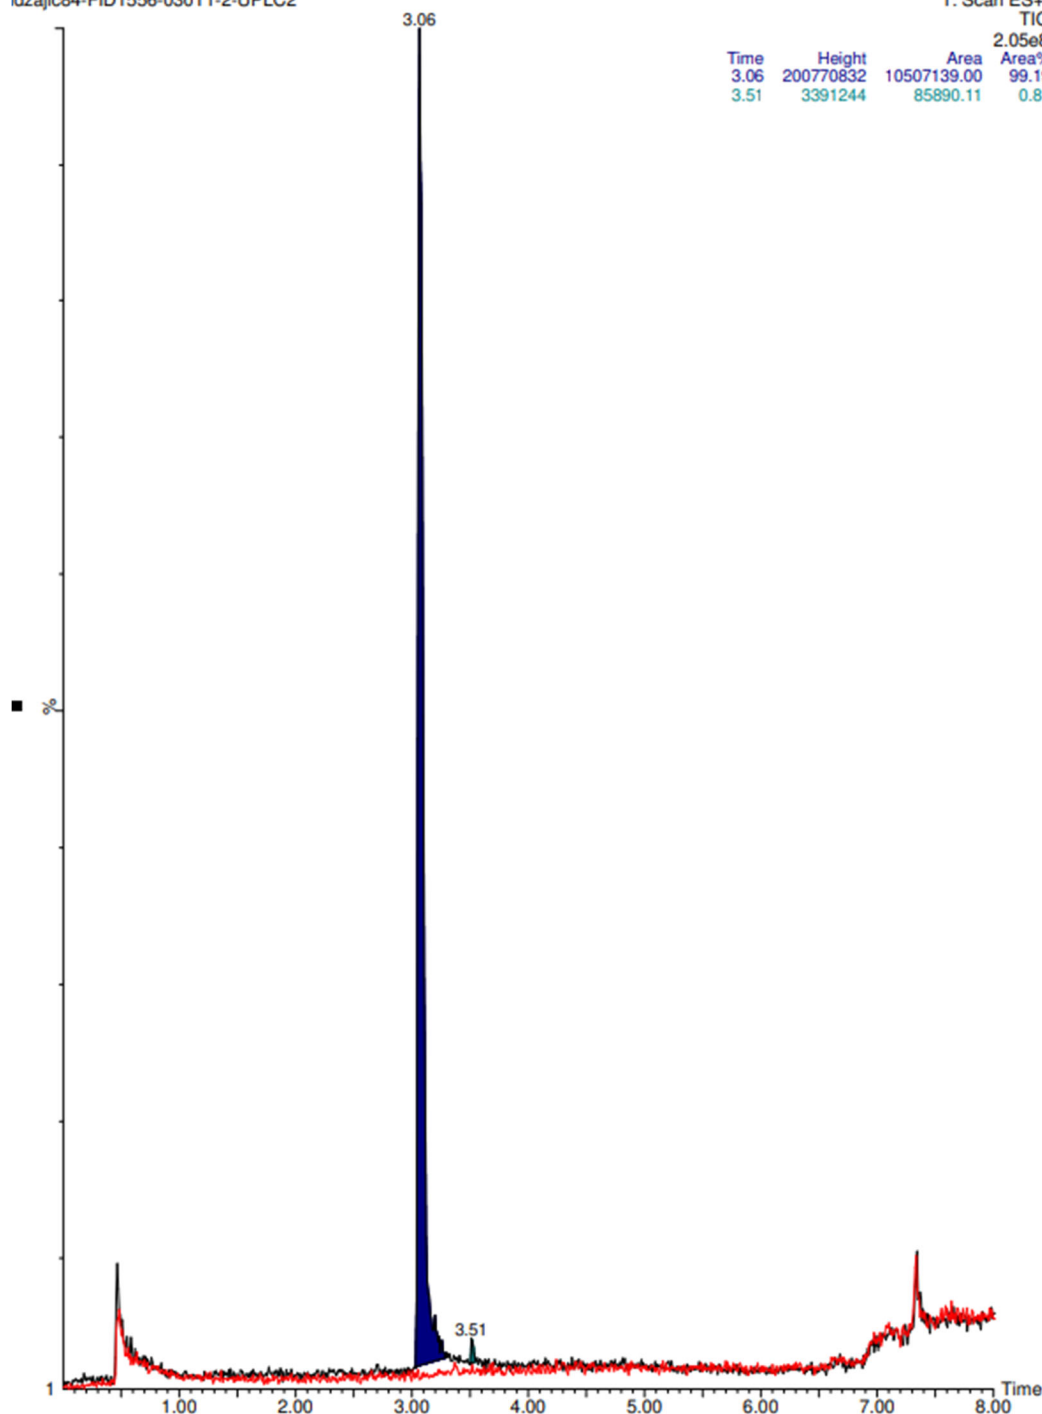

| Peak ID | Compound | Time | Mass Found |
|---------|----------|------|------------|
| 3       |          | 3.07 |            |

SAMPLE: 1:9 Combine (360:372-(342:347+385:390))

1: MS ES+  
3.3e+007

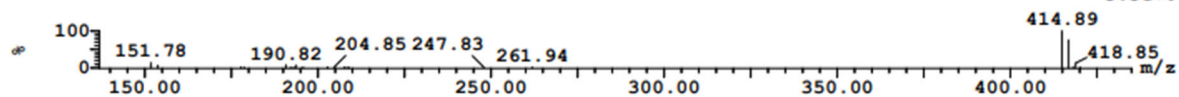

| Peak ID | Compound | Time | Mass Found |
|---------|----------|------|------------|
| 3       |          | 3.07 |            |

SAMPLE: 1:9 Combine (359:371-(341:346+384:389))

2: MS ES-  
1.1e+006

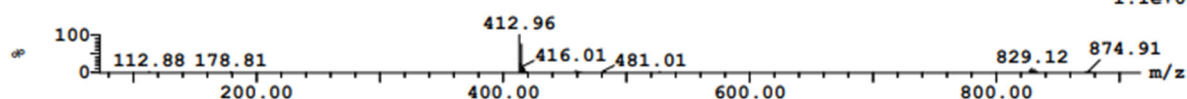

18

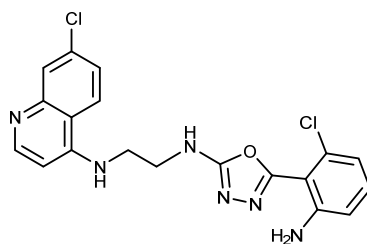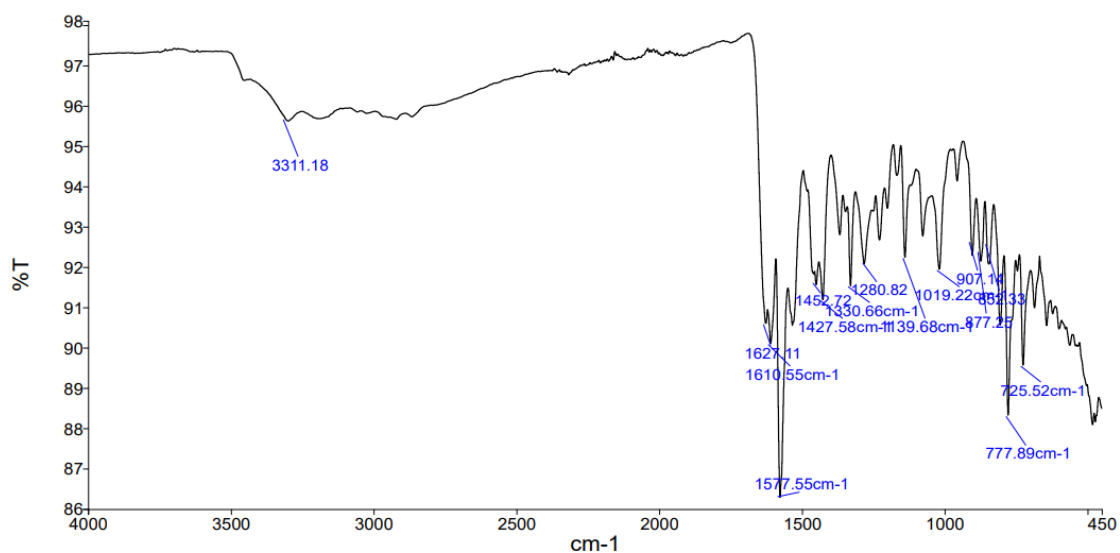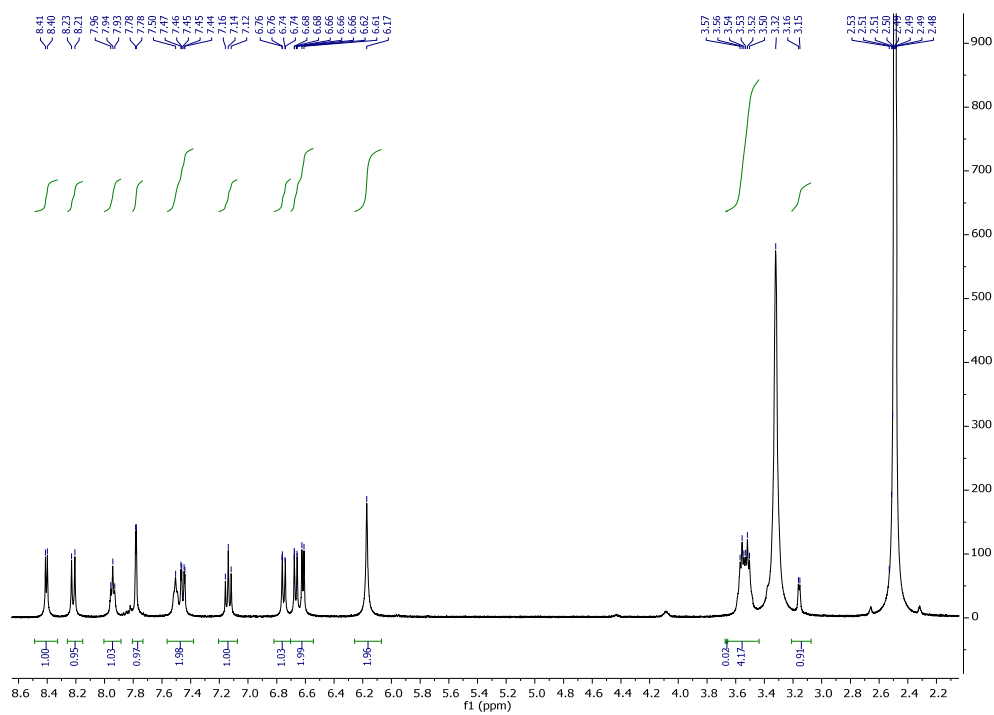

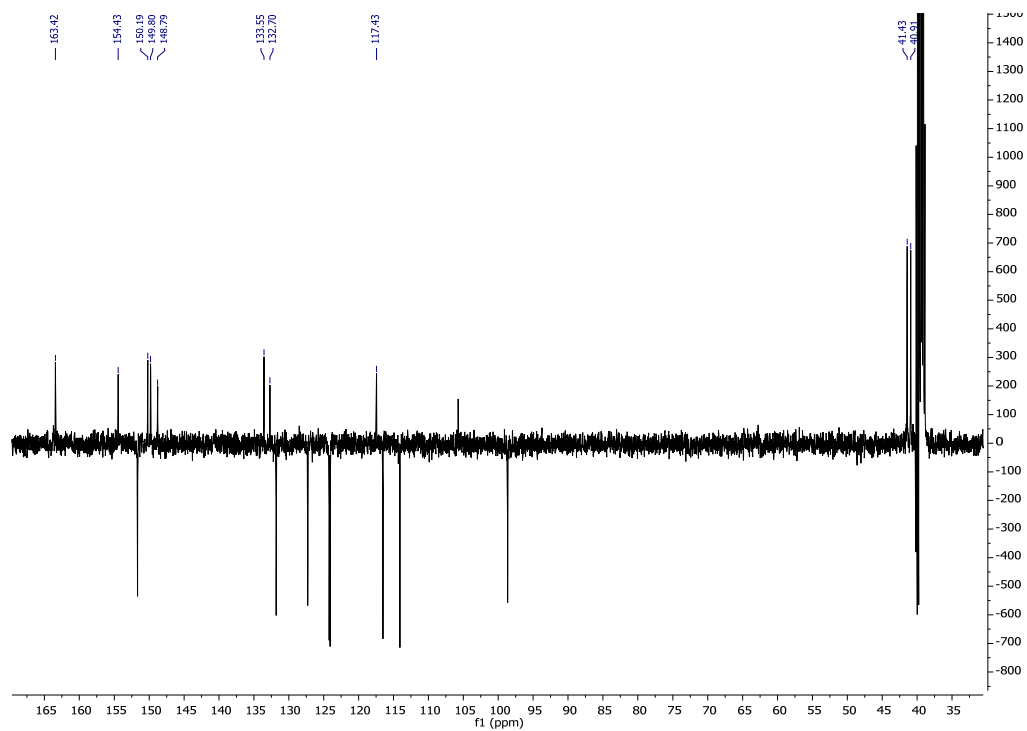

ldzajic8-FID1556-047F1-2 Sb (10,10.00)

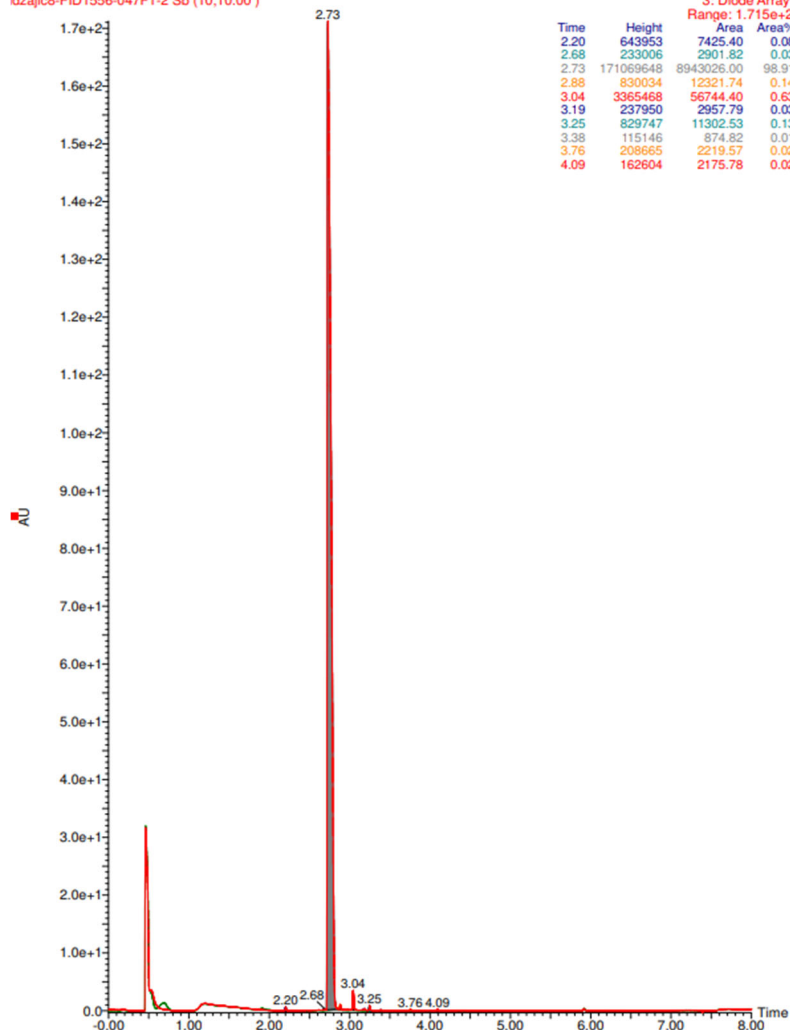

3: Diode Array  
Range: 1.715e+2

| Time | Height    | Area       | Area% |
|------|-----------|------------|-------|
| 2.20 | 643953    | 7425.40    | 0.08  |
| 2.68 | 233006    | 2901.82    | 0.03  |
| 2.73 | 171069648 | 8943026.00 | 98.91 |
| 2.88 | 830034    | 12321.74   | 0.14  |
| 3.04 | 3365468   | 56744.40   | 0.63  |
| 3.19 | 237950    | 2957.79    | 0.03  |
| 3.25 | 829747    | 11302.53   | 0.13  |
| 3.38 | 115146    | 874.82     | 0.01  |
| 3.76 | 208665    | 2219.57    | 0.02  |
| 4.09 | 162604    | 2175.78    | 0.02  |

Peak ID Compound Time Mass Found  
3 2.75

SAMPLE: 2:16 Combine (322:334-(304:309+347:352))

1:MS ES+  
2.3e+007

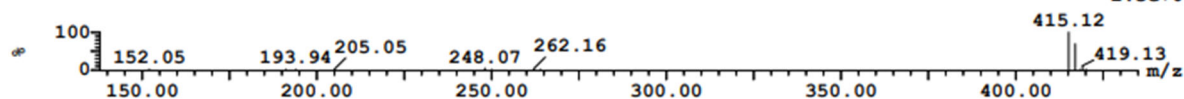

Peak ID Compound Time Mass Found  
3 2.75

SAMPLE: 2:16 Combine (324:336-(306:311+349:354))

2:MS ES-  
9.5e+005

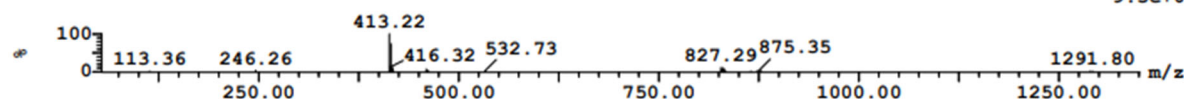



19

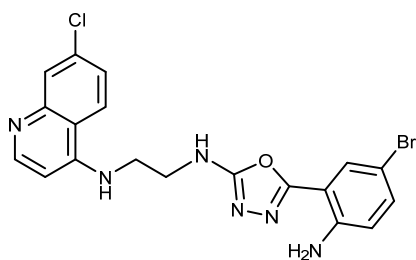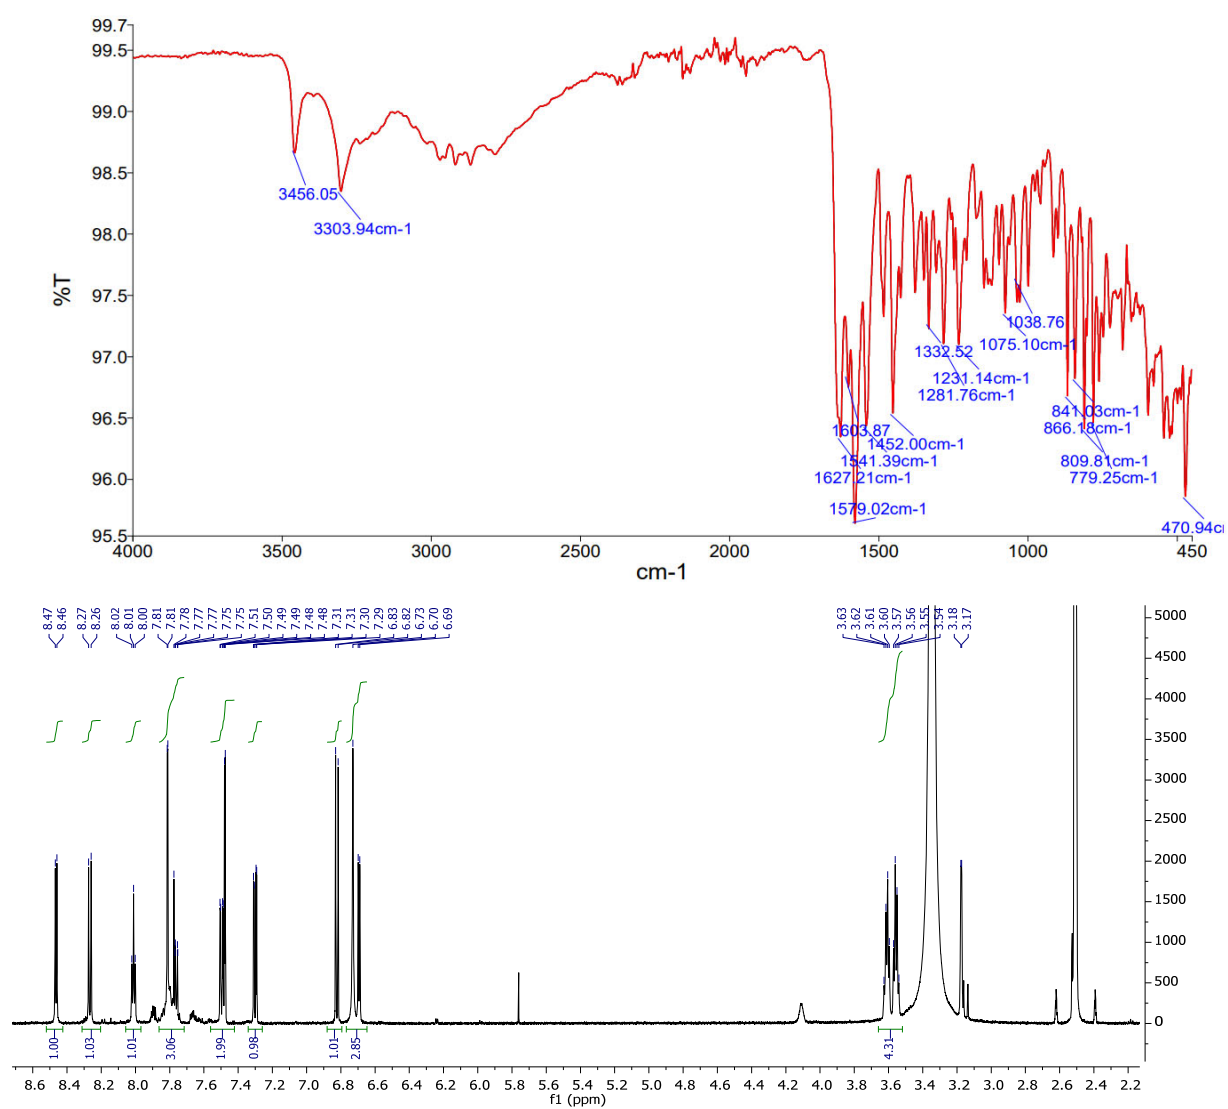

dzajic4-FID1556-032A2-2 Sb (10,10.00)

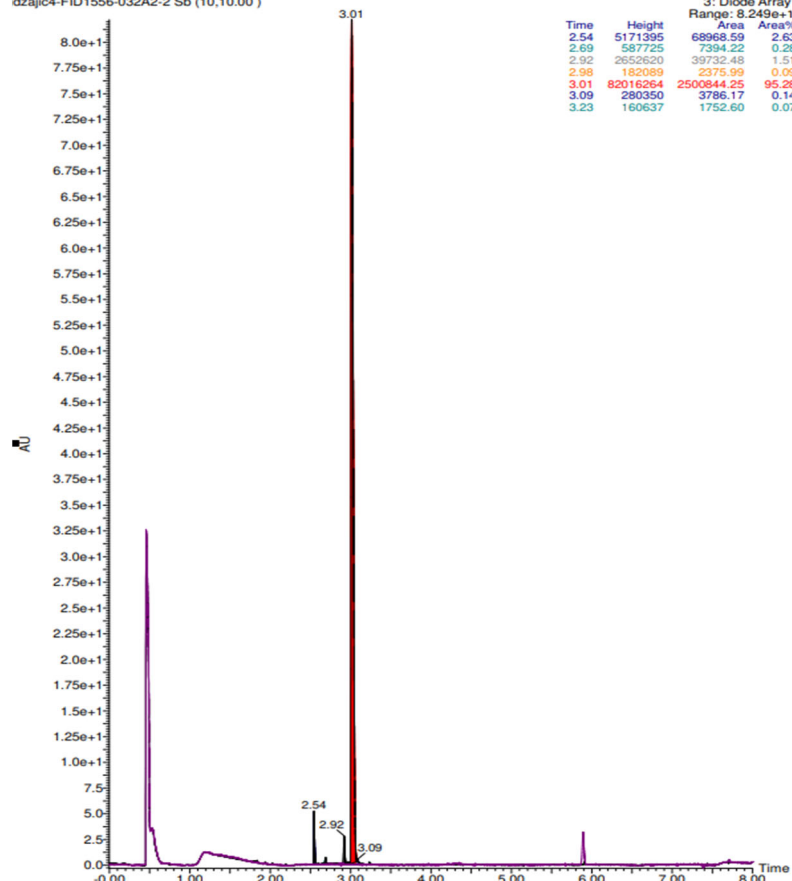

| 3: Diode Array |          |            |       |
|----------------|----------|------------|-------|
| Time           | Height   | Area       | Area% |
| 2.54           | 5171395  | 68968.59   | 2.63  |
| 2.69           | 587725   | 7394.22    | 0.28  |
| 2.92           | 2652620  | 39732.48   | 1.51  |
| 2.98           | 182089   | 2375.99    | 0.09  |
| 3.01           | 82016264 | 2500844.25 | 95.28 |
| 3.09           | 280350   | 3786.17    | 0.14  |
| 3.23           | 160637   | 1752.60    | 0.07  |

Peak ID Compound Time Mass Found  
 5  
 SAMPLE: 1:6 Combine (357:369-(339:344+382:387))

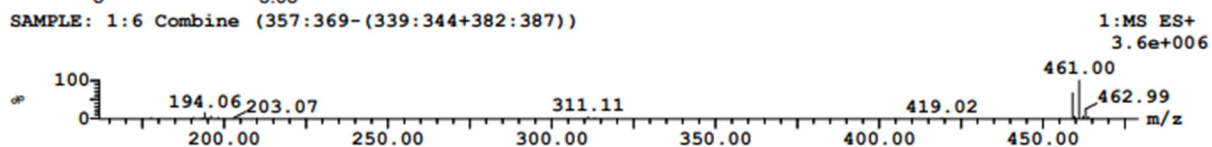

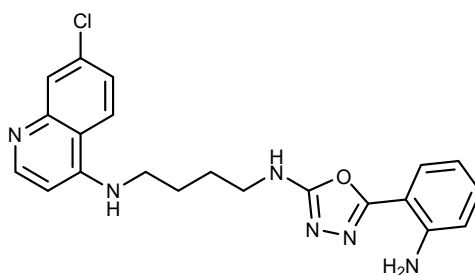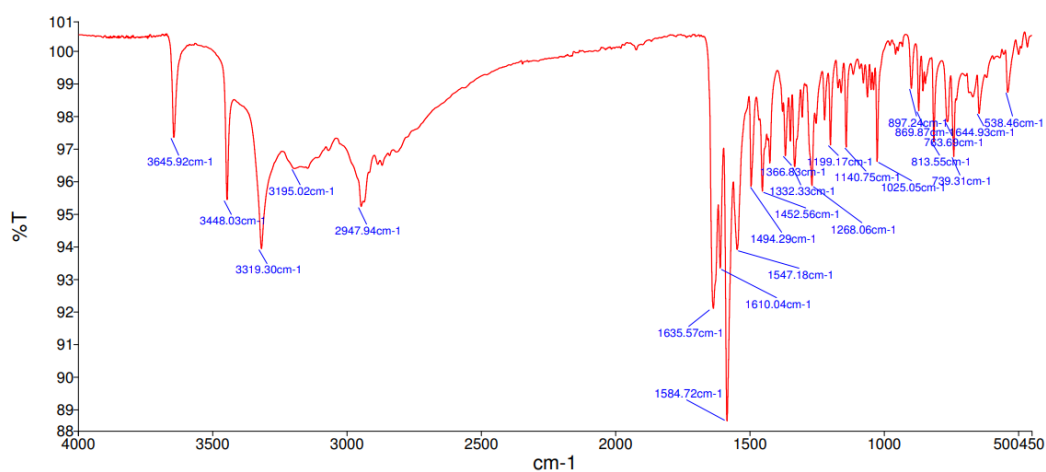

| Spectrum Source            | Fragmentor Voltage | Collision Energy | Ionization Mode |
|----------------------------|--------------------|------------------|-----------------|
| Peak (1) in "+/- TIC Scan" |                    | 0                | ESI             |

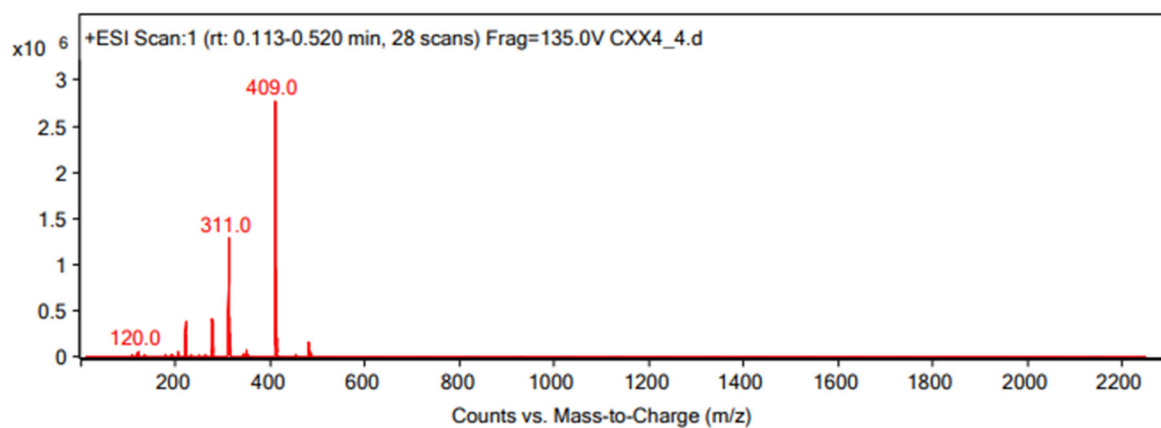



21

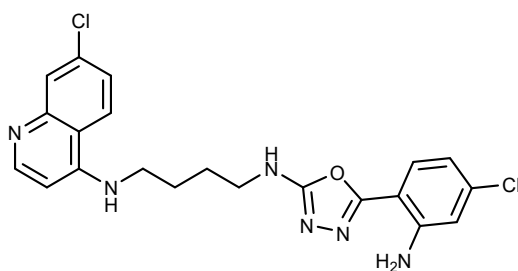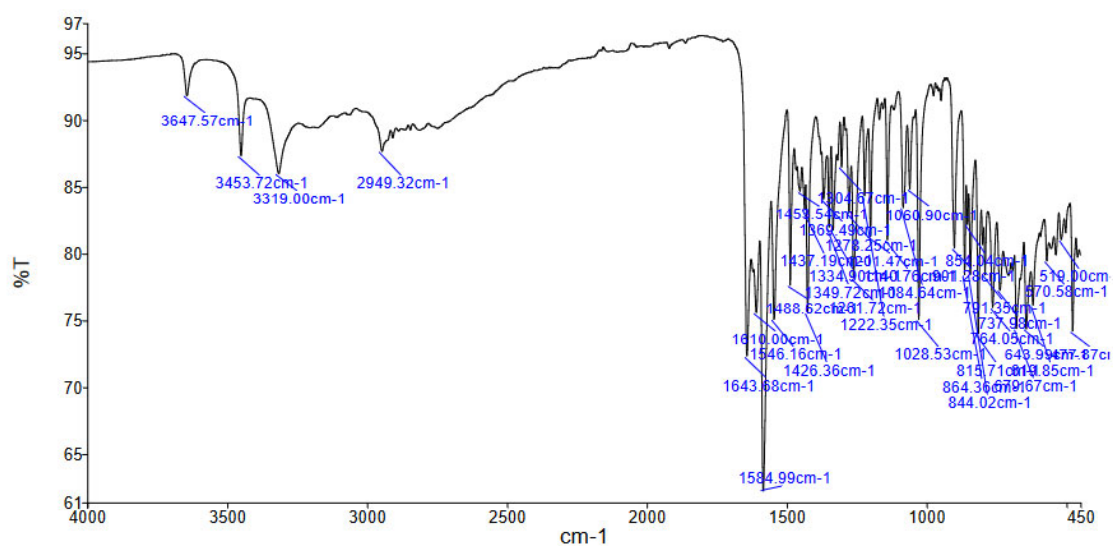

| Spectrum Source            | Fragmentor Voltage | Collision Energy | Ionization Mode |
|----------------------------|--------------------|------------------|-----------------|
| Peak (1) in "+/- TIC Scan" |                    | 0                | ESI             |

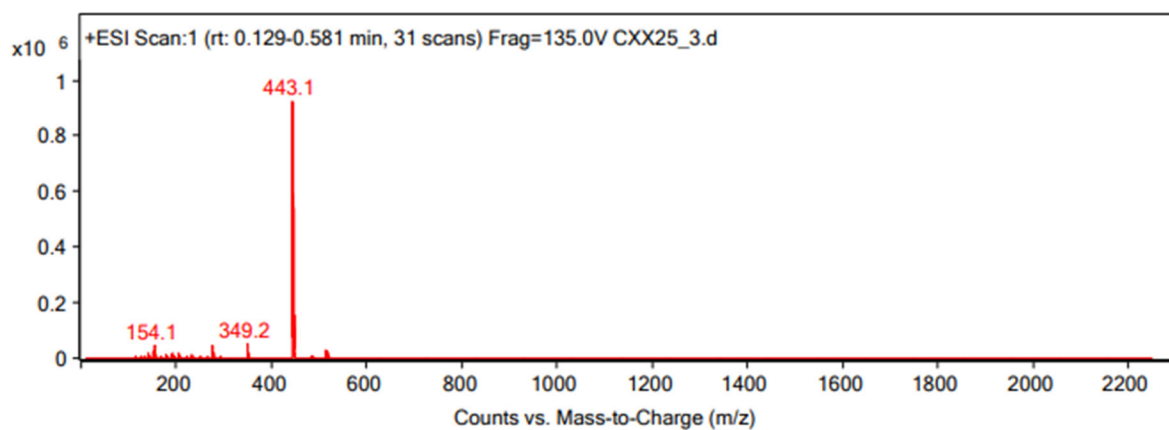

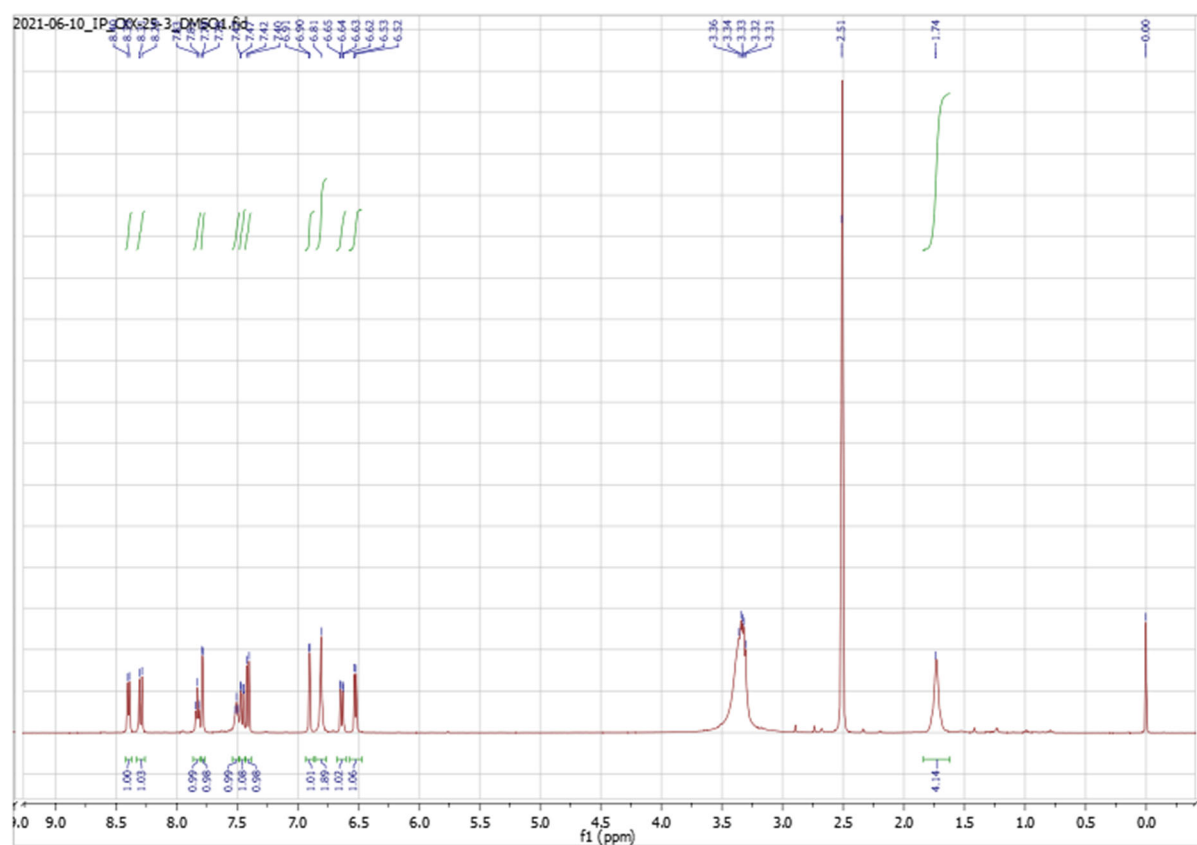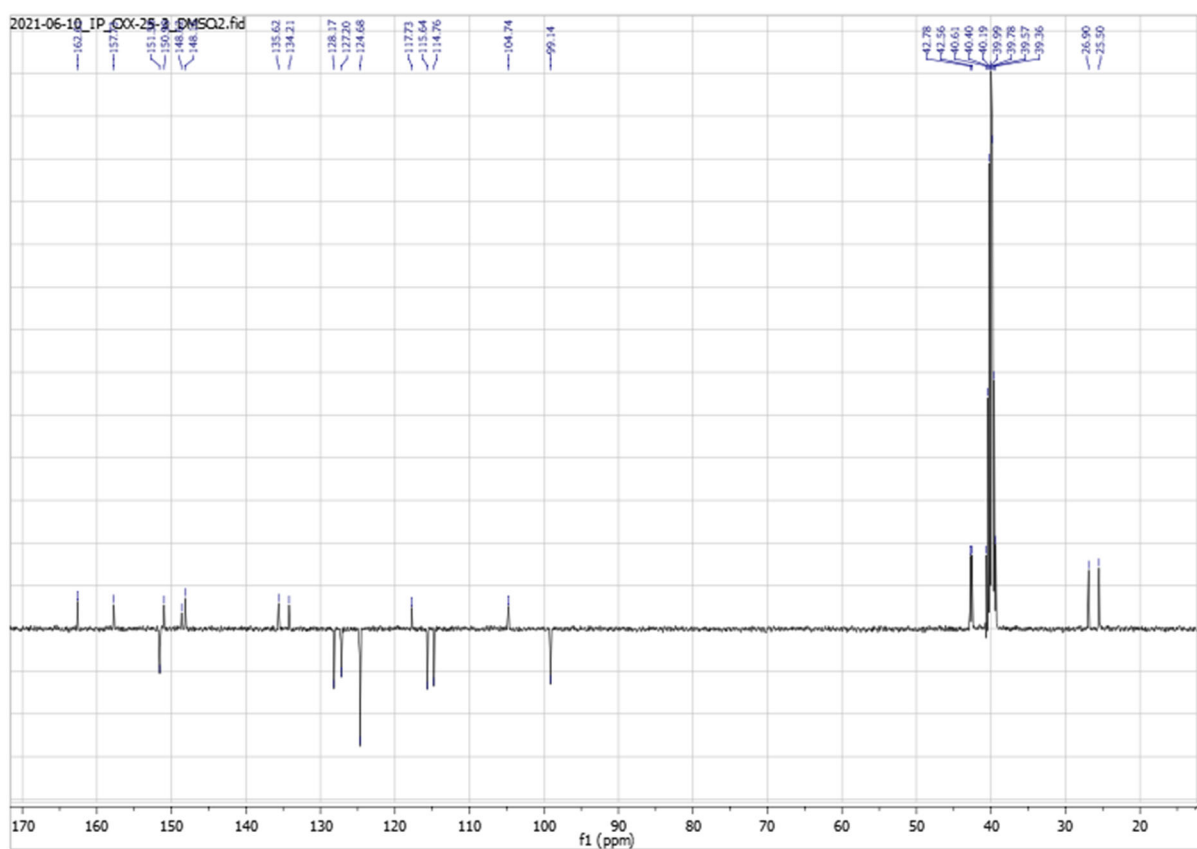

22

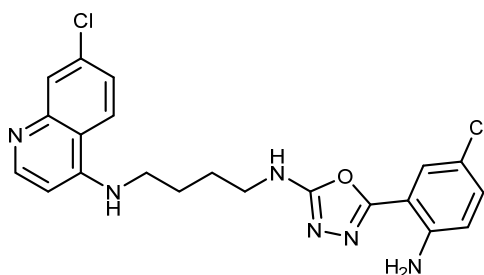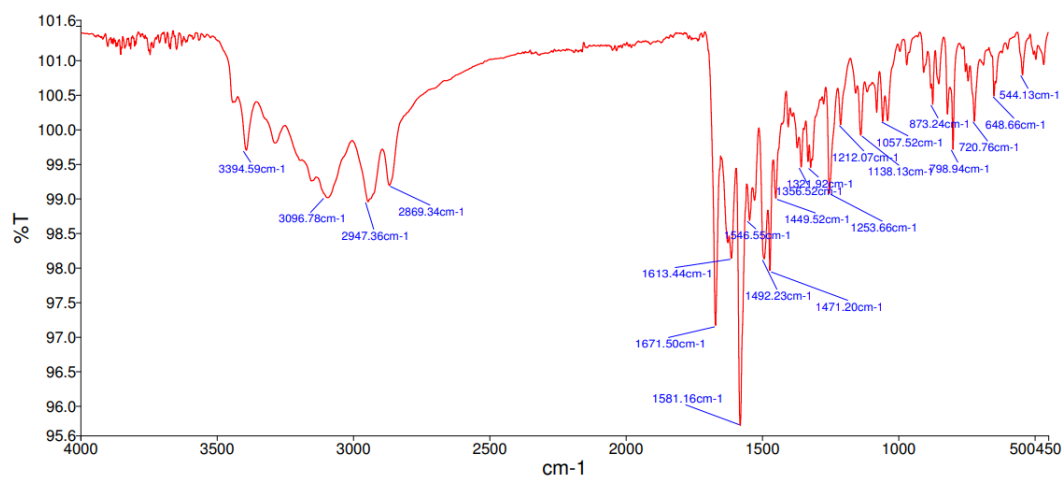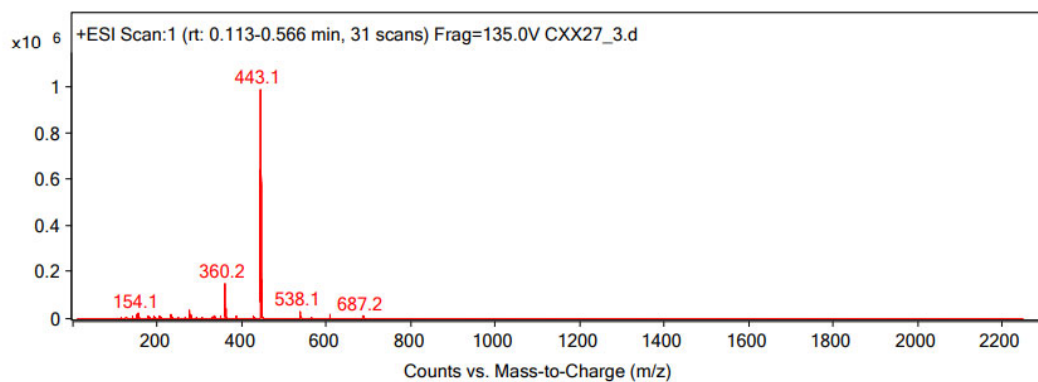

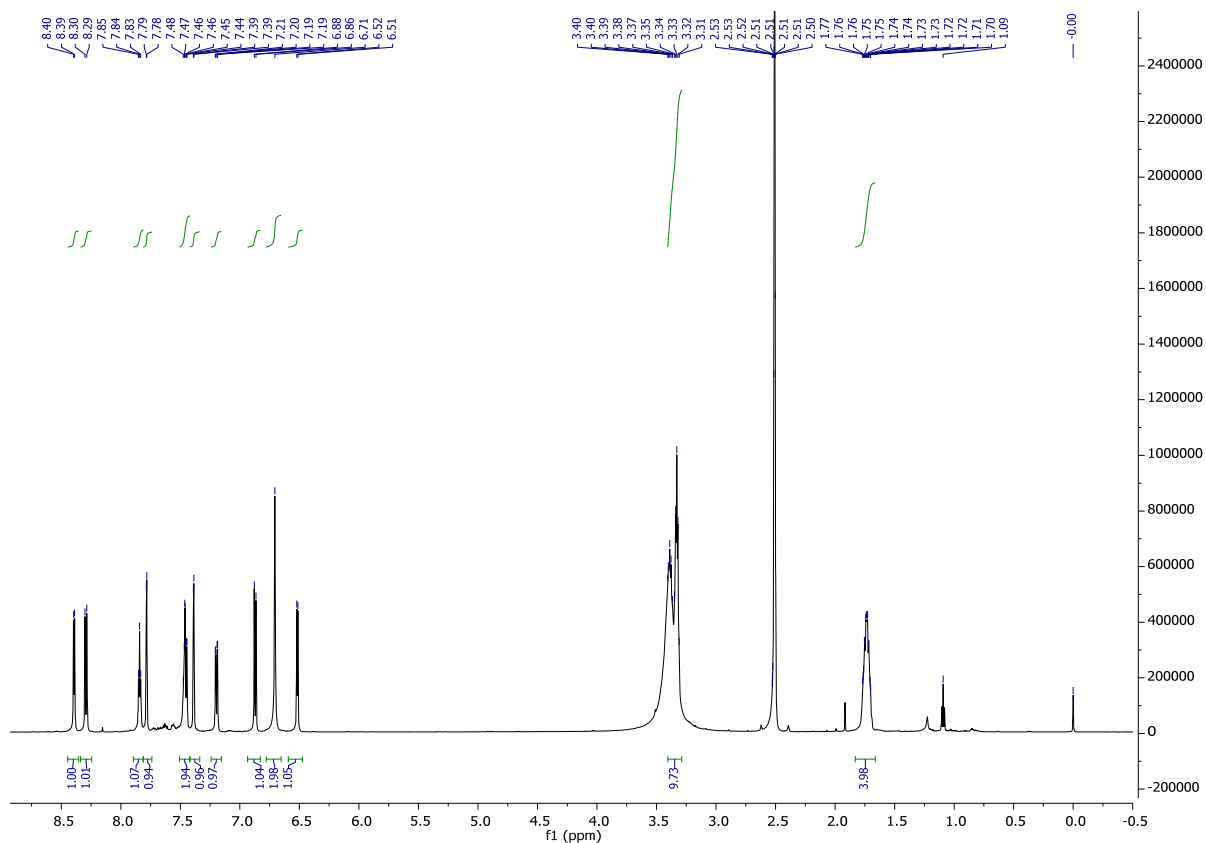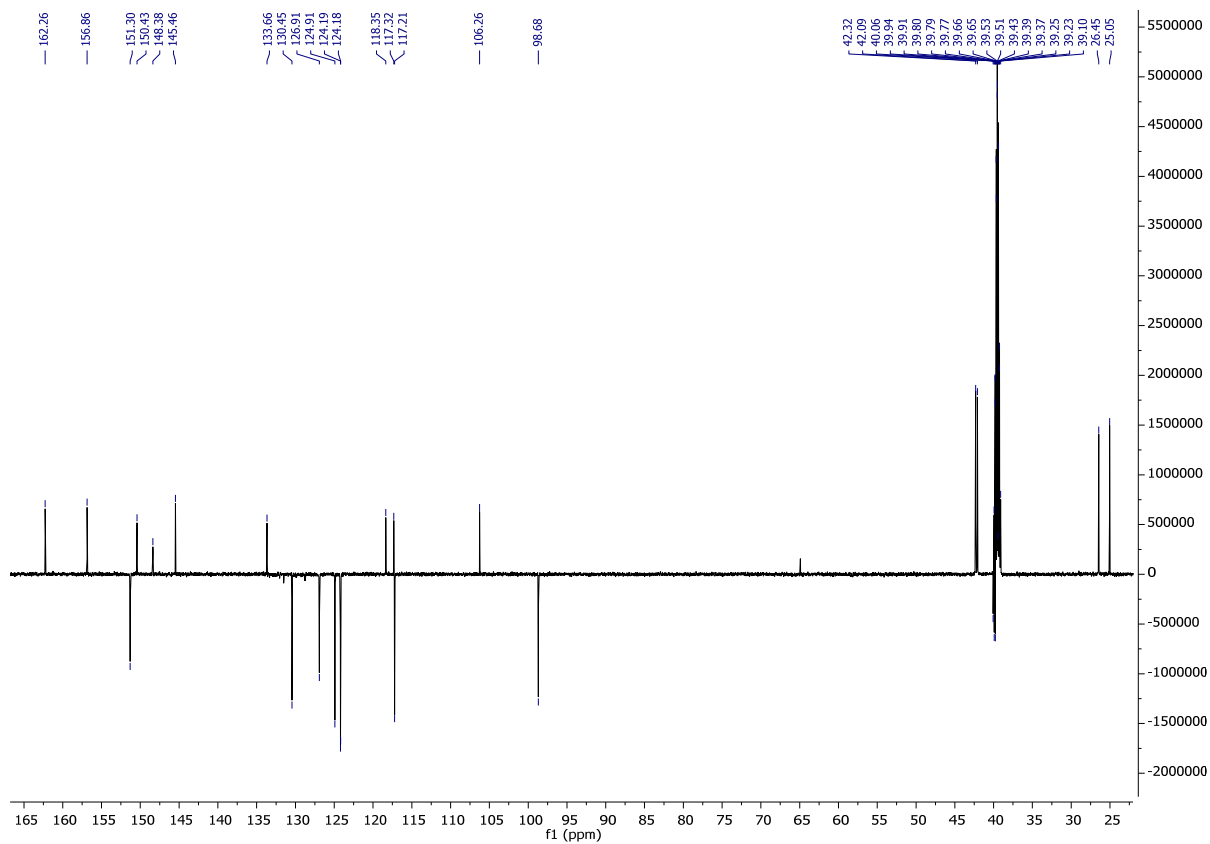



23

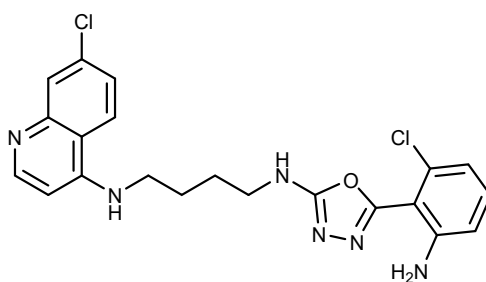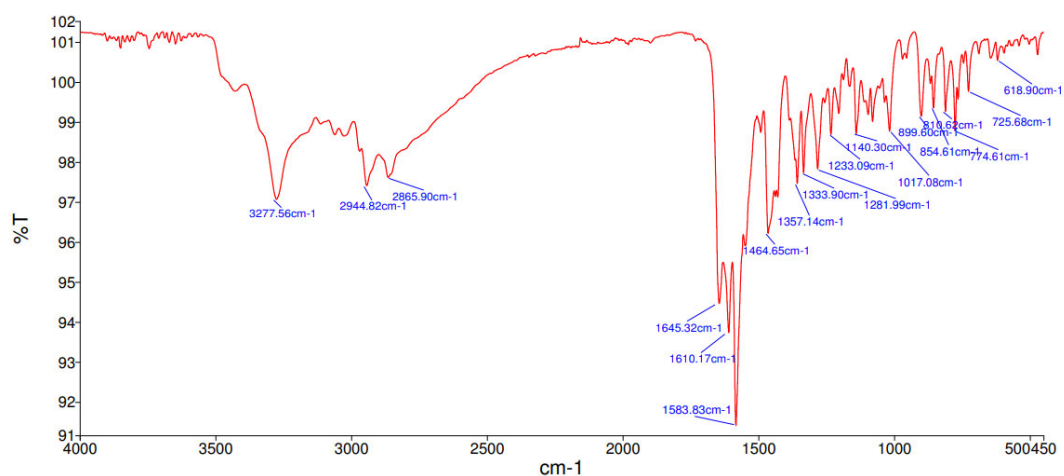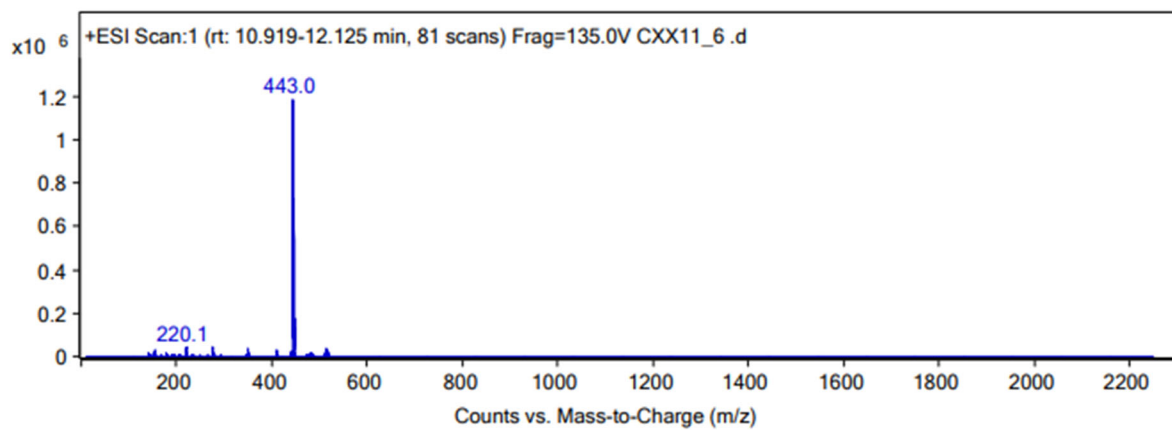

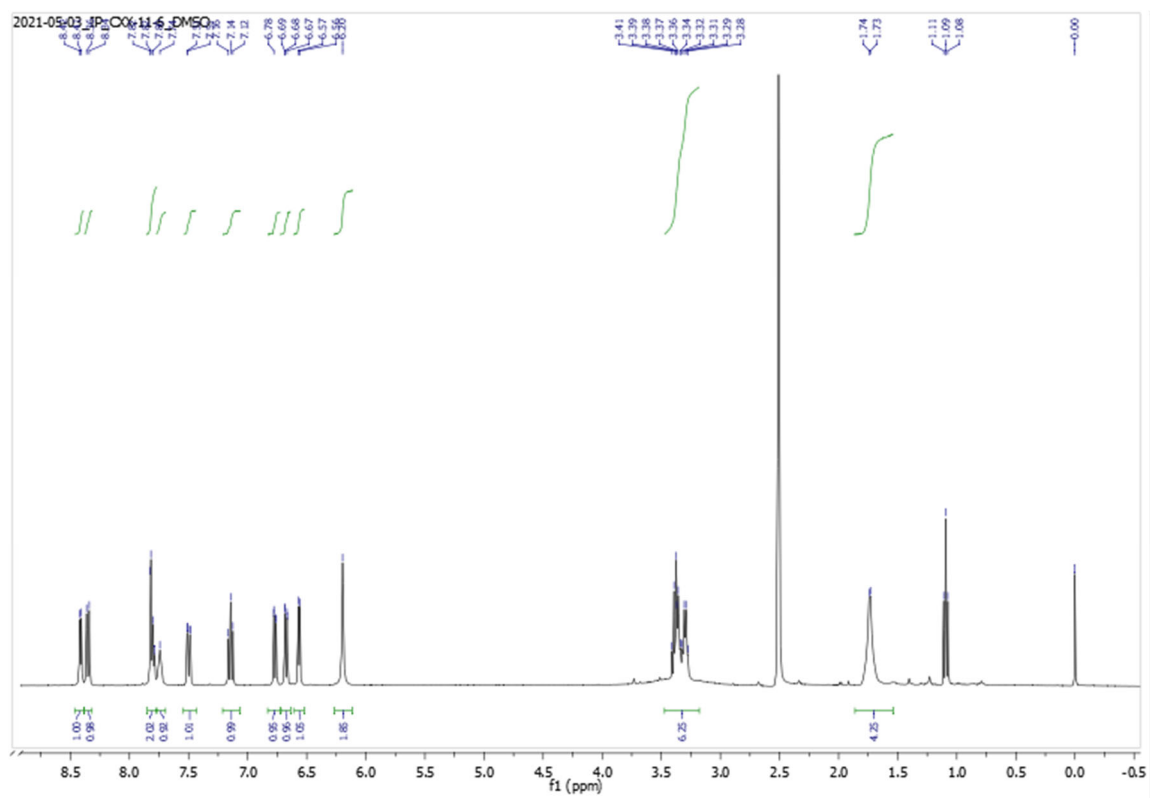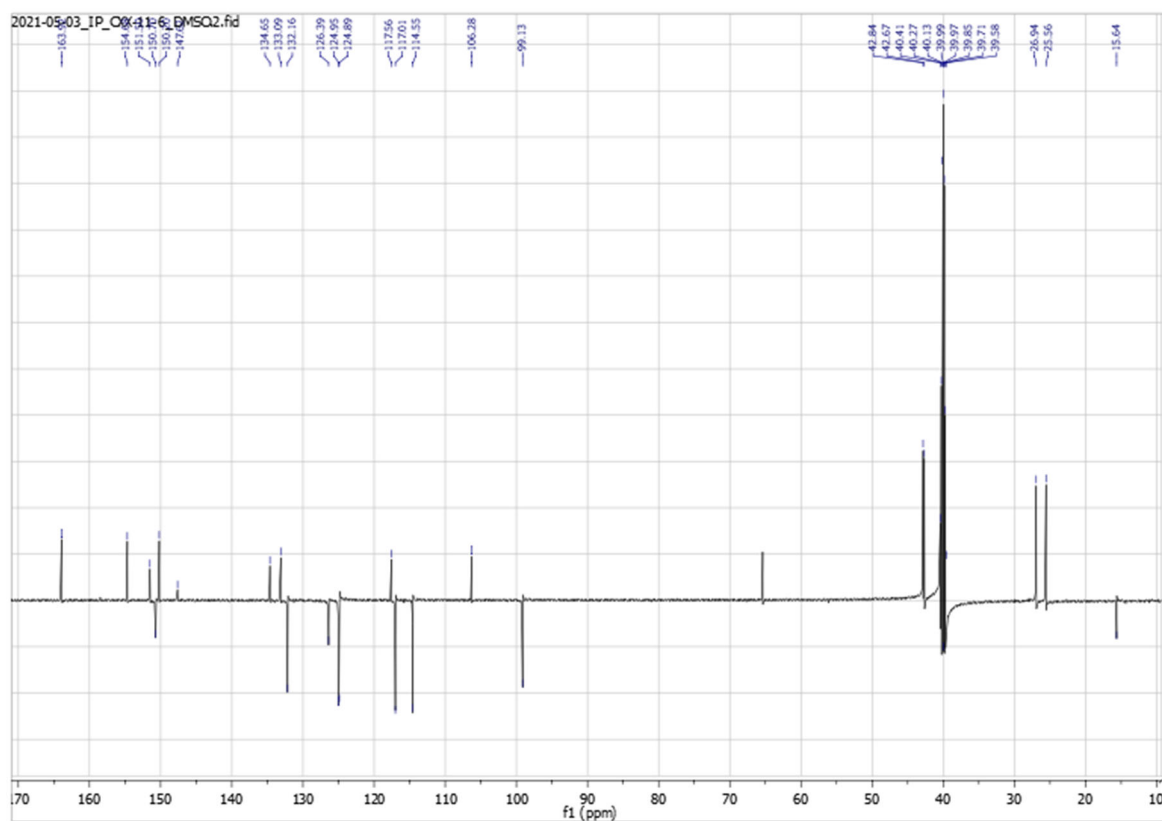

Supplement: s1 [file s1]
